# Supplementary material for: A lysine-based 2:1-[α/aza]-pseudopeptide series used as additives in polymeric membranes for CO2 capture: synthesis, structural studies, and application
Source: Royal Society of Chemistry journal article supplement (doi:10.1039/d3ra00409k), 2023-01-01
Supplement: d3ra00409k1.pdf [file d3ra00409k1.pdf]

## Supporting Information

### Lysine-based 2:1-[ $\alpha$ /aza]- pseudopeptide series used as additives in polymeric membranes for CO<sub>2</sub> capture: synthesis, structural studies, and application

Mohamed I. A. Ibrahim<sup>\*a,b,c</sup>, Xavier Solimando<sup>a</sup>, Loïc Stefan<sup>a</sup>, Guillaume Pickaert<sup>a</sup>, Jérôme Babin<sup>a</sup>, Carole Arnal-Herault<sup>a</sup>, Denis Roizard<sup>d</sup>, Anne Jonquières<sup>a</sup>, Jacques Bodiguel<sup>a</sup>, and Marie-Christine Averlant-Petit<sup>\*a</sup>

<sup>a</sup>*Laboratoire de Chimie-Physique Macromoléculaire (LCPM), UMR 7375, CNRS, Université de Lorraine, Nancy, France.*

<sup>b</sup>*Laboratory of Marine Chemistry, National Institute of Oceanography and Fisheries, NIOF, Egypt.*

<sup>c</sup>*Hiroshima Synchrotron Radiation Center (HiSOR), Hiroshima University, 2-313 Kagamiyama, Higashi-Hiroshima, Hiroshima 739-0046, Japan*

<sup>d</sup>*Laboratoire Réactions et Génie des Procédés (LRGP), UMR 7274, CNRS, Université de Lorraine, Nancy, France.*

#### \*Corresponding authors :

Dr. Marie-Christine Averlant-Petit

[marie.averlant@univ-lorraine.fr](mailto:marie.averlant@univ-lorraine.fr)

 <https://orcid.org/0000-0001-89956-1231>

[IdHal : marie-christine-averlant-petit](#)

Dr. Mohamed Ibrahim Abdelmoneim Ibrahim

 <https://orcid.org/0000-0001-6190-5899>

 opus ID: 57195522700

[m.ibrahim@niof.sci.eg](mailto:m.ibrahim@niof.sci.eg) / [ibrahimmohamed2030@gmail.com](mailto:ibrahimmohamed2030@gmail.com) / [ibra2020@hiroshima-u.ac.jp](mailto:ibra2020@hiroshima-u.ac.jp)

## TABLE OF CONTENTS

|                                                                                                                                                                                                                                                                           |     |
|---------------------------------------------------------------------------------------------------------------------------------------------------------------------------------------------------------------------------------------------------------------------------|-----|
| <b>Characterization data</b> .....                                                                                                                                                                                                                                        | 3-8 |
| <b>Table S1.</b> Assignment of the CO groups in <b>7c</b> and <b>7d</b> , (3.0 mmol L <sup>-1</sup> , CDCl <sub>3</sub> ).....                                                                                                                                            | 8   |
| <b>Table S2:</b> Mean dihedral angles of molecules ( <b>7c</b> ) and ( <b>7d</b> ) calculated from 25.000 structures obtained by the molecular dynamic simulations versus the classical torsion angles in peptides and proteins.....                                      | 8   |
| <b>Table S3.</b> The possible intramolecular hydrogen bonds predicted from 25.000 structures in ( <b>7c</b> ) and ( <b>7d</b> ) obtained by the molecular dynamic simulations .....                                                                                       | 8   |
| <b>Table S4.</b> Mean dihedral angles of molecules ( <b>8c</b> ) and ( <b>8d</b> ) calculated from 25.000 structures obtained by the molecular dynamic simulations versus the classical torsion angles in peptides and proteins.....                                      | 9   |
| <b>Table S5.</b> Mean values of the bond distances and bond angles for the predicted intramolecular hydrogen bonds calculated from 25.000 structures in ( <b>8c</b> ) and ( <b>8d</b> ) obtained by the molecular dynamic simulations.....                                | 10  |
| <b>Table S6.</b> Average percentages of the expected intramolecular hydrogen bonds in ( <b>8c</b> ) obtained by the molecular dynamic simulations.....                                                                                                                    | 10  |
| <b>Table S7.</b> Average percentages of the expected intramolecular hydrogen bonds in ( <b>8d</b> ) obtained by the molecular dynamic simulations.....                                                                                                                    | 11  |
| <b>Table S8.</b> Membrane permeation properties for CO <sub>2</sub> and N <sub>2</sub> pure gases at 35 °C and 2 bar.....                                                                                                                                                 | 12  |
| <b>Figure S1a.</b> The <sup>1</sup> H spectrum of ( <b>7c</b> ); (3.0 mmol L <sup>-1</sup> , CDCl <sub>3</sub> , 300 K).....                                                                                                                                              | 13  |
| <b>Figure S1b.</b> The <sup>13</sup> C spectrum of ( <b>7c</b> ); (5.0 mmol L <sup>-1</sup> , CDCl <sub>3</sub> , 300 K).....                                                                                                                                             | 13  |
| <b>Figure S2a.</b> The <sup>1</sup> H spectrum of ( <b>7d</b> ); (3.0 mmol L <sup>-1</sup> , CDCl <sub>3</sub> , 300 K).....                                                                                                                                              | 14  |
| <b>Figure S2b.</b> The <sup>13</sup> C spectrum of ( <b>7d</b> ); (5.0 mmol L <sup>-1</sup> , CDCl <sub>3</sub> , 300 K).....                                                                                                                                             | 14  |
| <b>Figure S3.</b> The 2D ROESY spectrum illustrating the correlations of βII-turn conformation in ( <b>7c</b> ); (300 MHz, 3.0 mmol L <sup>-1</sup> , CDCl <sub>3</sub> , 300 K).....                                                                                     | 15  |
| <b>Figure S4.</b> The 2D ROESY spectrum illustrating the correlations of βII'-turn conformation in ( <b>7d</b> ); (300 MHz, 3.0 mmol L <sup>-1</sup> , CDCl <sub>3</sub> , 300 K).....                                                                                    | 15  |
| <b>Figure S5.</b> Chemical shift-variations (δ) ppm of NH protons for ( <b>7c</b> ) and ( <b>7d</b> ) as a function of % [CDCl <sub>3</sub> /DMSO- <i>d</i> <sub>6</sub> ] mixtures; (300 MHz, 3.0 mmol L <sup>-1</sup> ).....                                            | 16  |
| <b>Figure S6.</b> Nomenclature used for the backbone dihedral angles of four oligomers ( <b>7c</b> , <b>7d</b> , <b>8c</b> and <b>8d</b> ).....                                                                                                                           | 16  |
| <b>Figure S7.</b> The <sup>1</sup> H spectrum of ( <b>8c</b> ); (4.0 mmol L <sup>-1</sup> , CDCl <sub>3</sub> , 300 K).....                                                                                                                                               | 17  |
| <b>Figure S8a.</b> The <sup>1</sup> H spectrum of ( <b>8c</b> ); (4.0 mmol L <sup>-1</sup> , CD <sub>3</sub> CN, 300 K).....                                                                                                                                              | 18  |
| <b>Figure S8b.</b> The <sup>13</sup> C spectrum of ( <b>8c</b> ); (4.0 mmol L <sup>-1</sup> , CD <sub>3</sub> CN, 300 K).....                                                                                                                                             | 18  |
| <b>Figure S9a.</b> The <sup>1</sup> H spectrum of ( <b>8d</b> ); (4.0 mmol L <sup>-1</sup> , CDCl <sub>3</sub> , 300 K).....                                                                                                                                              | 19  |
| <b>Figure S9b.</b> The <sup>13</sup> C spectrum of ( <b>8d</b> ); (5.0 mmol L <sup>-1</sup> , CDCl <sub>3</sub> , 300 K).....                                                                                                                                             | 20  |
| <b>Figure S10.</b> The <sup>1</sup> H spectrum of ( <b>8d</b> ); (4.0 mmol L <sup>-1</sup> , CD <sub>3</sub> CN, 300 K).....                                                                                                                                              | 20  |
| <b>Figure S11.</b> The 2D ROESY spectrum illustrating the β-turn conformation in ( <b>8c</b> ); (300 MHz, 4.0 mmol L <sup>-1</sup> , CDCl <sub>3</sub> , 300 K).....                                                                                                      | 21  |
| <b>Figure S12.</b> The 2D ROESY spectrum illustrating the correlations of β-turn conformation in ( <b>8d</b> ); (300 MHz, 4.0 mmol L <sup>-1</sup> , CDCl <sub>3</sub> , 300 K).....                                                                                      | 21  |
| <b>Figure S13.</b> Chemical shift-variations (δ) of NH protons for: ( <b>8c</b> ; up), and ( <b>8d</b> ; bottom) as a function of % [CDCl <sub>3</sub> /DMSO- <i>d</i> <sub>6</sub> ] mixtures.....                                                                       | 22  |
| <b>Figure S14.</b> (a) Evaporation of butanol during membrane casting on a PTFE mold, and(b) example of a prepared membrane containing 4.0 wt% of the deprotected trimer ( <b>7c'</b> ) pseudopeptide as additive in Pebax®1074 polymer before gases separation test..... | 23  |

### Characterization data

*N*-tert-butyloxycarbonylaminophthalimide (**2**) was obtained as a white crystal (yield 86%) after recrystallization from ethyl acetate; m.p. 214 - 216 °C; <sup>1</sup>H NMR (300 MHz, CDCl<sub>3</sub>, 8.0 mmol L<sup>-1</sup>) δ<sub>H</sub> 1.49 (2 s, 9H, C(CH<sub>3</sub>)<sub>3</sub>), 6.61 (br s, 1H, NH), 7.76-7.79 (m, 2H, H arom Phth), 7.89-7.92 (m, 2H, H arom Phth). <sup>13</sup>C NMR (75 MHz, CDCl<sub>3</sub>, 8.0 mmol L<sup>-1</sup>) δ<sub>C</sub> 28.4 (C(CH<sub>3</sub>)<sub>3</sub>), 83.81 (C(CH<sub>3</sub>)<sub>3</sub>), 124.65 (CH arom Phth), 130.68 (C arom Phth), 135.37 (CH arom Phth), 154.07 (N-COOt-Bu), 166.13 (O=C-Pht). IR (KBr)  $\tilde{\nu}_{\max}$  = 3395 cm<sup>-1</sup> (NH); 1706 cm<sup>-1</sup>, 1740 cm<sup>-1</sup>, 1783 cm<sup>-1</sup> (C=O). HRMS (ESI) for [C<sub>13</sub>H<sub>14</sub>N<sub>2</sub>O<sub>4</sub>]: calculated [M+H]<sup>+</sup> (m/z) 263.0954; found, 263.1034.

*N*-benzyl-*N*-tert-butyloxycarbonylaminophthalimide (**3**) was obtained as white solid (yield 90%) after flash chromatography (0.04 – 0.063 μm) using (15% ethyl acetate : 85% petroleum ether) as eluent; m.p. 107 - 109 °C; <sup>1</sup>H NMR (300 MHz, CDCl<sub>3</sub>, 8.0 mmol L<sup>-1</sup>) δ<sub>H</sub> 1.37 and 1.52 (2 s, 9H, C(CH<sub>3</sub>)<sub>3</sub>), 4.85 and 4.89 (2 s, 2H, NCH<sub>2</sub>), 7.27 - 7.44 (2 m, 5H, H arom Ph), 7.73-7.84 (m, 4H, H arom Phth). <sup>13</sup>C NMR (75 MHz, CDCl<sub>3</sub>, 8.0 mmol L<sup>-1</sup>) δ<sub>C</sub> 28.59 and 28.86 (C(CH<sub>3</sub>)<sub>3</sub>), 53.35 and 55.32 (NCH<sub>2</sub>), 83.17 and 83.95 (C(CH<sub>3</sub>)<sub>3</sub>), 124.41 (CH arom Phth), 128.58 (CH arom Ph), 129.02 (CH arom Ph), 129.20 (CH arom Ph), 129.73 (CH arom Ph), 130.44 (C arom), 130.64 (C arom), 135.20 (CH arom Phth), 154.18 (N-COOt-Bu), 165.71 (O=C-Pht). IR (NaCl)  $\tilde{\nu}_{\max}$  = 1737 cm<sup>-1</sup>, 1796 cm<sup>-1</sup> (C=O). HRMS (ESI) for [C<sub>20</sub>H<sub>20</sub>N<sub>2</sub>O<sub>4</sub>]: calculated [M+Na]<sup>+</sup> (m/z) 375.1321; found, 375.1314.

*N*-alkylaminophthalimide (**4**) was obtained as a pure yellow solid (quantitative 100%) without purification; m.p. 109 - 110 °C; <sup>1</sup>H NMR (300 MHz, CDCl<sub>3</sub>, 8.0 mmol L<sup>-1</sup>) δ<sub>H</sub> 4.22 (s, 2H, NCH<sub>2</sub>), 4.56 (br, 1H, NH), 7.27-7.47 (m, 5H, H arom Ph), 7.71-7.83 (m, 4H, H arom Phth). <sup>13</sup>C NMR (75 MHz, CDCl<sub>3</sub>, 10.0 mmol L<sup>-1</sup>) δ<sub>C</sub> 55.97 (NCH<sub>2</sub>), 124.07 (CH arom Phth), 128.73 (CH arom Ph), 129.22 (CH arom Ph), 129.89 (CH arom Ph), 130.92 (C arom Phth), 134.87 (CH arom Phth), 136.69 (C arom Ph), 167.06 (O=C-Phth). IR (NaCl)  $\tilde{\nu}_{\max}$  = 3290 cm<sup>-1</sup> (NH); 1774 cm<sup>-1</sup>, 1719 cm<sup>-1</sup> (C=O). HRMS (ESI) for [C<sub>15</sub>H<sub>12</sub>N<sub>2</sub>O<sub>2</sub>]: calculated [M+H]<sup>+</sup> (m/z) 253.0977; found, 253.0963.

Pht-azaPhe-Ala-OMe (**5a**) was obtained as a pure white solid (yield 92%) after trituration with cold diethyl ether; m.p. 158 - 161 °C; <sup>1</sup>H NMR (300 MHz, CDCl<sub>3</sub>, 8.0 mmol L<sup>-1</sup>) δ<sub>H</sub> 1.38 and 1.40 (d, 3H, CH<sub>3</sub>), 3.72 (s, 3H, COOCH<sub>3</sub>), 4.53 (m, 1H, C<sup>α</sup>H), 4.86-4.97 (m, 2H, CH<sub>2</sub>), 5.31 and 5.37 (d, 1H, NH), 7.23-7.42 (m, 5H, H arom Ph), 7.75-7.85 (m, 4H, H arom Phth). <sup>13</sup>C NMR (75 MHz, CDCl<sub>3</sub>, 10.0 mmol L<sup>-1</sup>) δ<sub>C</sub> 19.60 (CH<sub>3</sub>), 50.19 (C<sup>α</sup>H), 53.14 (COOCH<sub>3</sub>), 53.62 (NCH<sub>2</sub>), 124.62 (CH arom Phth), 128.89 (CH arom Ph), 129.20 (CH arom Ph), 129.80 (C arom Phth), 135.33 (C arom Ph), 135.51 (CH arom Phth), 156.15 (O=C-NH), 165.84 (O=C-Phth), 174.32 (COOCH<sub>3</sub>). IR (ATR)  $\tilde{\nu}_{\max}$  = 3353 cm<sup>-1</sup> (NH); 1647 cm<sup>-1</sup>, 1677 cm<sup>-1</sup>, 1736 cm<sup>-1</sup>, 1751 cm<sup>-1</sup> (C=O). HRMS (ESI) for [C<sub>20</sub>H<sub>19</sub>N<sub>3</sub>O<sub>5</sub>]: calculated [M+Na+MeOH]<sup>+</sup> (m/z) 436.1479; found, 436.1457.

Boc-azaPhe-Ala-OMe (**6a**) was obtained as a pure white solid (yield 89%) after flash chromatography (0.04 – 0.063 μm) using (30% ethyl acetate : 70% petroleum ether) as eluent; m.p. 90 - 91 °C; <sup>1</sup>H NMR (300 MHz, CDCl<sub>3</sub>, 8.0 mmol L<sup>-1</sup>) δ<sub>H</sub> 1.42-1.47 (m, 12H, CH<sub>3</sub> and C(CH<sub>3</sub>)<sub>3</sub>), 3.76 (s, 3H, COOCH<sub>3</sub>), 4.50-4.60 (m, 1H, C<sup>α</sup>H), 4.85 (br s, 2H, NCH<sub>2</sub>), 5.91 and 5.94 (d, 1H, NH), 5.97 (br s, 1H, NHBoc), 7.26-7.37 (m, 5H, H arom Ph). <sup>13</sup>C NMR (75 MHz, CDCl<sub>3</sub>, 10.0 mmol L<sup>-1</sup>) δ<sub>C</sub> 19.70 (CH<sub>3</sub>), 28.75 (C(CH<sub>3</sub>)<sub>3</sub>), 49.84 (C<sup>α</sup>H), 51.25 (NCH<sub>2</sub>), 52.99 (COOCH<sub>3</sub>), 83.04 (C(CH<sub>3</sub>)<sub>3</sub>), 128.53 (CH

arom Ph), 129.45 (CH arom Ph), 129.59 (CH arom Ph), 136.73 (C arom Ph), 154.90 (COOt-Bu), 157.61 (O=C-NH), 174.75 (COOCH<sub>3</sub>). **IR (ATR)**  $\tilde{\nu}_{\max}$  = 3207 cm<sup>-1</sup>, 3415 cm<sup>-1</sup> (NH); 1647 cm<sup>-1</sup>, 1723 cm<sup>-1</sup>, 1732 cm<sup>-1</sup> (C=O). **HRMS (ESI)** for [C<sub>17</sub>H<sub>25</sub>N<sub>3</sub>O<sub>5</sub>]: calculated [M+H]<sup>+</sup> (m/z) 352.1872; found, 352.1878.

Boc-azaPhe-Lys(z)-OMe (**6b**) was obtained as an oily sticky product (yield 85%) after flash chromatography (0.04 – 0.063  $\mu$ m) using (45% ethyl acetate : 55% petroleum ether) as eluent; **<sup>1</sup>H NMR** (300 MHz, CDCl<sub>3</sub>, 8.0 mmol L<sup>-1</sup>)  $\delta_{\text{H}}$  1.40-1.90 (m, 15H, (C <sup>$\beta$</sup> H<sub>2</sub>, C <sup>$\epsilon$</sup> H<sub>2</sub>, C <sup>$\delta$</sup> H<sub>2</sub>) and C(CH<sub>3</sub>)<sub>3</sub>), 3.15-3.21 (m, 2H, C <sup>$\epsilon$</sup> H<sub>2</sub>), 3.73 (s, 3H, COOCH<sub>3</sub>), 4.51-4.58 (m, 1H, C <sup>$\alpha$</sup> H), 4.99 (br s, 2H, NCH<sub>2</sub>), 5.07 (s, 2H, CH<sub>2</sub>(Z)), 5.89 and 5.92 (d, 1H, NH), 6.02 (br s, 1H, NHBoc), 7.22-7.33 (m, 10H, H arom Ph). **<sup>13</sup>C NMR** (75 MHz, CDCl<sub>3</sub>, 10.0 mmol L<sup>-1</sup>)  $\delta_{\text{C}}$  .70 (CH<sub>3</sub>),  $\delta_{\text{C}}$  22.89 (C <sup>$\gamma$</sup> H<sub>2</sub>), 28.73 (C(CH<sub>3</sub>)<sub>3</sub>), 29.82(C <sup>$\delta$</sup> H<sub>2</sub>), 33.33 (C <sup>$\beta$</sup> H<sub>2</sub>), 41.39 (C <sup>$\epsilon$</sup> H<sub>2</sub>), 51.39 (NCH<sub>2</sub>), 53.00 (OCH<sub>3</sub>), 53.61 (C <sup>$\alpha$</sup> H), 67.23 (OCH<sub>2</sub>), 83.10 (C(CH<sub>3</sub>)<sub>3</sub>), 128.56 (CH arom Ph), 128.70 (CH arom Ph), 128.76 (CH arom Ph), 129.15 (CH arom Ph), 129.46 (CH arom Ph), 129.59 (CH arom Ph), 136.72 (C arom Ph), 137.38 (C arom Ph), 154.87 (COOt-Bu), 156.17 (O=C-NH), 157.86 (COOCH<sub>2</sub>Ph), 174.13 (COOCH<sub>3</sub>). **IR (ATR)**  $\tilde{\nu}_{\max}$  = 3331 cm<sup>-1</sup>, 3439 cm<sup>-1</sup> (NH); 1656 cm<sup>-1</sup>, 1701 cm<sup>-1</sup>, 1718 cm<sup>-1</sup>, 1735 cm<sup>-1</sup> (C=O). **HRMS (ESI)** for [C<sub>28</sub>H<sub>38</sub>N<sub>4</sub>O<sub>7</sub>]: calculated [M+Na]<sup>+</sup> (m/z) 565.2638; found, 565.2643; calculated [M+K]<sup>+</sup> (m/z) 581.3723; found, 581.2377.

Boc-Phe-azaPhe-Ala-OMe (**7a**) was obtained as a white solid (yield 74%) after flash chromatography (0.04 – 0.063  $\mu$ m) using (50% ethyl acetate : 50% petroleum ether) as eluent; m.p. 149 - 150 °C; **<sup>1</sup>H NMR** (300 MHz, CDCl<sub>3</sub>, 10.0 mmol L<sup>-1</sup>)  $\delta_{\text{H}}$  1.37-1.43 (m, 12H, CH<sub>3</sub> and C(CH<sub>3</sub>)<sub>3</sub>), 2.88-2.95 and 3.01-3.08 (m, 2H, CH<sub>2</sub>), 3.71 (s, 3H, COOCH<sub>3</sub>), 4.03 (m, 1H, CH), 4.28 (br s, 1H, NHBoc), 4.43-4.51 (m, 1H, CH), 4.90-4.95 (br m, 2H, NCH<sub>2</sub>), 6.2 (br s, 1H, NH), 7.06-7.30 (m, 10H, H arom Ph), 7.73 (br s, 1H, NH). **<sup>13</sup>C NMR** (75 MHz, CDCl<sub>3</sub>)  $\delta_{\text{C}}$  18.71 (CH<sub>3</sub>), 28.88 (C(CH<sub>3</sub>)<sub>3</sub>), 37.83 (CH<sub>2</sub>), 50.11 (C <sup>$\alpha$</sup> H), 52.01 (NCH<sub>2</sub>), 52.86 (COOCH<sub>3</sub>), 56.0 (C <sup>$\alpha$</sup> H), 81.55 (C(CH<sub>3</sub>)<sub>3</sub>), 128.05 (CH arom Ph), 128.25 (CH arom Ph), 129.15 (CH arom Ph), 129.42 (CH arom Ph), 129.63 (CH arom Ph), 129.85 (CH arom Ph), 136.45 (C arom Ph), 137.10 (C arom Ph), 156.43 (COOt-Bu), 157.57 (O=C-NH), 171.08 (O=C-NH), 174.88 (COOCH<sub>3</sub>). **IR (CDCl<sub>3</sub>)**  $\tilde{\nu}_{\max}$  = 3370 cm<sup>-1</sup>, 3440 cm<sup>-1</sup> (NH); 1656 cm<sup>-1</sup>, 1673 cm<sup>-1</sup>, 1705 cm<sup>-1</sup>, 1723 cm<sup>-1</sup>, 1743 cm<sup>-1</sup> (C=O). **HRMS (ESI)** for [C<sub>26</sub>H<sub>34</sub>N<sub>4</sub>O<sub>6</sub>]: calculated [M+Na]<sup>+</sup> (m/z) 521.2376; found, 521.2344.

Boc-D-Phe-azaPhe-Ala-OMe (**7b**) was obtained as a white solid (yield 70%) after flash chromatography (0.04 – 0.063  $\mu$ m) using (50% ethyl acetate : 50% petroleum ether) as eluent; m.p. 72 - 73 °C; **<sup>1</sup>H NMR** (300 MHz, CDCl<sub>3</sub>, 8.0 mmol L<sup>-1</sup>)  $\delta_{\text{H}}$  1.39-1.41 (m, 12H, CH<sub>3</sub> and C(CH<sub>3</sub>)<sub>3</sub>), 2.82-2.89 and 3.09-3.16 (m, 2H, CH<sub>2</sub>), 3.71 (s, 3H, COOCH<sub>3</sub>), 4.09-4.16 (m, 1H, C <sup>$\alpha$</sup> H), 4.42-4.49 (br m, 1H, C <sup>$\alpha$</sup> H), 4.67 (br s, 2H, NCH<sub>2</sub>), 4.79 (br d, 1H, NHBoc), 6.04 (br s, 1H, NH), 7.12-7.35 (m, 10H, H arom Ph), 7.52 (br s, 1H, NH). **<sup>13</sup>C NMR** (75 MHz, CDCl<sub>3</sub>, 10.0 mmol L<sup>-1</sup>)  $\delta_{\text{C}}$  18.57 (CH<sub>3</sub>), 28.88 (C(CH<sub>3</sub>)<sub>3</sub>), 37.90 (CH<sub>2</sub>), 50.03 (C <sup>$\alpha$</sup> H), 51.86 (NCH<sub>2</sub>), 52.85 (COOCH<sub>3</sub>), 56.27 (C <sup>$\alpha$</sup> H), 81.96 (C(CH<sub>3</sub>)<sub>3</sub>), 128.16 (CH arom Ph), 128.35 (CH arom Ph), 129.23 (CH arom Ph), 129.56 (CH arom Ph), 129.75 (CH arom Ph), 129.82 (CH arom Ph), 136.30 (C arom Ph), 137.18 (C arom Ph), 156.69 (COOt-Bu), 157.54 (O=C-NH), 170.90 (O=C-NH), 174.67 (COOCH<sub>3</sub>). **IR (CDCl<sub>3</sub>)**  $\tilde{\nu}_{\max}$  = 3372 cm<sup>-1</sup>, 3439 cm<sup>-1</sup> (NH), 1657 cm<sup>-1</sup>, 1674 cm<sup>-1</sup>, 1705 cm<sup>-1</sup>, 1721 cm<sup>-1</sup>, 1741 cm<sup>-1</sup> (C=O). **HRMS (ESI)** for [C<sub>26</sub>H<sub>34</sub>N<sub>4</sub>O<sub>6</sub>]: calculated [M+Na]<sup>+</sup> (m/z) 521.2376; found, 521.2389.

*Boc-Lys(z)-azaPhe-Lys(z)-OMe (7c)* was obtained as a white foam (yield 72%) after flash chromatography (0.04 – 0.063  $\mu\text{m}$ ) using (60% dichloromethane : 38.5% ethyl acetate : 1.5% methanol) as eluent;  $^1\text{H NMR}$  (300 MHz,  $\text{CDCl}_3$ , 8.0 mmol  $\text{L}^{-1}$ )  $\delta_{\text{H}}$  1.31 (s, 9H,  $\text{C}(\text{CH}_3)$ ), 1.32-1.78 (m, 12H, 2\* ( $\text{C}^\beta\text{H}_2$ ,  $\text{C}^\epsilon\text{H}_2$ ,  $\text{C}^\delta\text{H}_2$ )), 2.98-3.04 (m, 2H,  $\text{C}^\epsilon\text{H}_2$ ), 3.07-3.14 (m, 2H,  $\text{C}^\epsilon\text{H}_2$ ), 3.62 (s, 3H,  $\text{COOCH}_3$ ), 3.73 (br m, 1H,  $\text{C}^\alpha\text{H}$ ), 4.45-4.47 (m, 1H,  $\text{C}^\alpha\text{H}$ ), 4.78 (br s, 1H, NHZ), 4.36 and 4.86 (m, 2H,  $\text{NCH}_2$ ), 4.99 (s, 2H,  $\text{CH}_2(\text{Z})$ ), 5.00 (s, 2H,  $\text{CH}_2(\text{Z})$ ), 5.06 (br, 1H,  $\text{NHBoc}$ ), 5.24 (br s, 1H, NHZ), 5.91 (br s, 1H, NH), 7.17-7.26 (m, 15H, H arom Ph), 7.75 (br s, 1H, NH).  $^{13}\text{C NMR}$  (75 MHz,  $\text{CDCl}_3$ , 10.0 mmol  $\text{L}^{-1}$ )  $\delta$  22.79 ( $\text{C}^\gamma\text{H}_2$ ), 22.93 ( $\text{C}^\gamma\text{H}_2$ ), 29.01 ( $\text{C}(\text{CH}_3)$ ), 29.51( $\text{C}^\delta\text{H}_2$ ), 29.98 ( $\text{C}^\delta\text{H}_2$ ), 31.23 ( $\text{C}^\beta\text{H}_2$ ), 32.41 ( $\text{C}^\beta\text{H}_2$ ), 40.70 ( $\text{C}^\epsilon\text{H}_2$ ), 41.32 ( $\text{C}^\epsilon\text{H}_2$ ), 51.91 ( $\text{NCH}_2$ ), 52.92 ( $\text{OCH}_3$ ), 53.76 ( $\text{C}^\alpha\text{H}$ ), 54.02 ( $\text{C}^\alpha\text{H}$ ), 67.33 ( $\text{OCH}_2$ ), 67.43 ( $\text{OCH}_2$ ), 81.27 ( $\text{C}(\text{CH}_3)_3$ ), 128.40 (CH arom Ph), 128.75 (CH arom Ph), 128.85 (CH arom Ph), 129.19 (CH arom Ph), 129.30 (CH arom Ph), 129.35 (CH arom Ph), 137.20 (C arom Ph), 156.69 ( $\text{COO}t\text{-Bu}$ ), 157.29 ( $\text{O}=\text{C}-\text{CH}_2\text{Ph}$ ), 157.68 ( $\text{O}=\text{C}-\text{NH}$ ), 172.20 ( $\text{O}=\text{C}-\text{NH}$ ), 174.06 ( $\text{COOCH}_3$ ). **IR** ( $\text{CDCl}_3$ )  $\tilde{\nu}_{\text{max}}$  = 3378  $\text{cm}^{-1}$ , 3449  $\text{cm}^{-1}$  (NH), 1652  $\text{cm}^{-1}$ , 1677  $\text{cm}^{-1}$ , 1701  $\text{cm}^{-1}$ , 1717  $\text{cm}^{-1}$ , 1735  $\text{cm}^{-1}$ , 1748  $\text{cm}^{-1}$  (C=O). **HRMS (ESI)** for [ $\text{C}_{42}\text{H}_{56}\text{N}_6\text{O}_{10}$ ]: calculated [ $\text{M}+\text{Na}$ ] $^+$  (m/z) 827;3956 found, 827.3978; calculated [ $\text{M}+\text{K}$ ] $^+$  (m/z) 843.3695 found, 843.3715.

*Boc-D-Lys(z)-azaPhe-Lys(z)-OMe (7d)* was obtained as a white foam (yield 69%) after flash chromatography (0.04 – 0.063  $\mu\text{m}$ ) using (60% dichloromethane : 38.5% ethyl acetate : 1.5% methanol) as eluent;  $^1\text{H NMR}$  (300 MHz,  $\text{CDCl}_3$ , 8.0 mmol  $\text{L}^{-1}$ )  $\delta_{\text{H}}$  1.41 (s, 9H,  $\text{C}(\text{CH}_3)$ ), 1.42-1.87 (m, 12H, 2\* ( $\text{C}^\beta\text{H}_2$ ,  $\text{C}^\epsilon\text{H}_2$ ,  $\text{C}^\delta\text{H}_2$ )), 3.06-3.11 (m, 2H,  $\text{C}^\epsilon\text{H}_2$ ), 3.16-3.20 (m, 2H,  $\text{C}^\epsilon\text{H}_2$ ), 3.68 (s, 3H,  $\text{COOCH}_3$ ), 3.80 (m, 1H,  $\text{C}^\alpha\text{H}$ ), 4.41-4.44 (m, 1H,  $\text{C}^\alpha\text{H}$ ), 4.48 and 5.00 (m, 2H,  $\text{NCH}_2$ ), 4.82 br s, 1H, NHZ), 5.05 (s, 2H,  $\text{CH}_2(\text{Z})$ ), 5.08 (s, 2H,  $\text{CH}_2(\text{Z})$ ), 5.24 (br, 1H,  $\text{NHBoc}$ ), 5.43 (br s, 1H, NHZ), 6.15 and 6.16 (br d, 1H, NH), 7.26-7.34 (m, 15H, H arom Ph), 7.83 (br s, 1H, NH).  $^{13}\text{C NMR}$  (75 MHz,  $\text{CDCl}_3$ , 10.0 mmol  $\text{L}^{-1}$ )  $\delta$  22.51 ( $\text{C}^\gamma\text{H}_2$ ), 23.13 ( $\text{C}^\gamma\text{H}_2$ ), 28.99 ( $\text{C}(\text{CH}_3)$ ), 29.43 ( $\text{C}^\delta\text{H}_2$ ), 30.21 ( $\text{C}^\delta\text{H}_2$ ), 30.92 ( $\text{C}^\beta\text{H}_2$ ), 31.71 ( $\text{C}^\beta\text{H}_2$ ), 40.27 ( $\text{C}^\epsilon\text{H}_2$ ), 40.91 ( $\text{C}^\epsilon\text{H}_2$ ), 51.96 ( $\text{NCH}_2$ ), 52.82 ( $\text{OCH}_3$ ), 54.18 ( $\text{C}^\alpha\text{H}$ ), 55.36 ( $\text{C}^\alpha\text{H}$ ), 67.09 ( $\text{OCH}_2$ ), 67.48 ( $\text{OCH}_2$ ), 81.81( $\text{C}(\text{CH}_3)_3$ ), 128.35 (CH arom Ph), 128.65 (CH arom Ph), 128.83 (CH arom Ph), 128.91 (CH arom Ph), 129.15 (CH arom Ph), 129.23 (CH arom Ph), 129.59 (CH arom Ph), 137.10 (C arom Ph), 137.39 (C arom Ph), 137.55 (C arom Ph), 157.25 ( $\text{COO}t\text{-Bu}$ ), 157.41 ( $\text{O}=\text{C}-\text{CH}_2\text{Ph}$ ), 157.63 ( $\text{O}=\text{C}-\text{CH}_2\text{Ph}$ ), 157.97 ( $\text{O}=\text{C}-\text{NH}$ ), 171.82 ( $\text{O}=\text{C}-\text{NH}$ ), 174.28 ( $\text{COOCH}_3$ ). **IR** ( $\text{CDCl}_3$ )  $\tilde{\nu}_{\text{max}}$  = 3302  $\text{cm}^{-1}$ , 3375  $\text{cm}^{-1}$ , 3449  $\text{cm}^{-1}$  (NH), 1652  $\text{cm}^{-1}$ , 1675  $\text{cm}^{-1}$ , 1702  $\text{cm}^{-1}$ , 1718  $\text{cm}^{-1}$ , 1734  $\text{cm}^{-1}$ , 1749  $\text{cm}^{-1}$  (C=O). **HRMS (ESI)** for [ $\text{C}_{42}\text{H}_{56}\text{N}_6\text{O}_{10}$ ]: calculated [ $\text{M}+\text{Na}$ ] $^+$  (m/z) 827.3956 found, 827.3986; calculated [ $\text{M}+\text{K}$ ] $^+$  (m/z) 843.3695 found, 843.3714.

*Boc-Phe-azaPhe-Lys(z)-OMe (7e)* was obtained as a white foam (yield 65%) after flash chromatography (0.04 – 0.063  $\mu\text{m}$ ) using (70% dichloromethane : 29% ethyl acetate : 1.0% methanol) as eluent;  $^1\text{H NMR}$  (300 MHz,  $\text{CDCl}_3$ , 10.0 mmol  $\text{L}^{-1}$ )  $\delta_{\text{H}}$  1.38 (s, 9H,  $\text{C}(\text{CH}_3)$ ), 1.48-1.85 (m, 6H, ( $\text{C}^\beta\text{H}_2$ ,  $\text{C}^\epsilon\text{H}_2$ ,  $\text{C}^\delta\text{H}_2$ )), 2.74-2.80 and 2.94-3.01 (m, 2H,  $\text{CH}_2$ ), 3.18-3.26 (m, 2H,  $\text{C}^\epsilon\text{H}_2$ ), 3.69 (s, 3H,  $\text{COOCH}_3$ ), 3.97 (m, 1H,  $\text{C}^\alpha\text{H}$ ), 4.02 (br s, 1H,  $\text{NHBoc}$ ), 4.48-4.54 (m, 1H,  $\text{C}^\alpha\text{H}$ ), 5.02 and 5.03 (br d, 2H,  $\text{NCH}_2$ ), 5.08 (s, 2H,  $\text{CH}_2(\text{Z})$ ), 5.40 (br s, 1H, NHZ), 5.97 and 5.99 (br d, 1H, NH), 6.97-7.34 (m, 15H, H arom Ph), 7.58 (br s, 1H, NH).  $^{13}\text{C NMR}$  (75 MHz,  $\text{CDCl}_3$ , 10.0 mmol  $\text{L}^{-1}$ )  $\delta$  22.89 ( $\text{C}^\gamma\text{H}_2$ ), 28.96 ( $\text{C}(\text{CH}_3)$ ), 29.49 ( $\text{C}^\delta\text{H}_2$ ), 32.33 ( $\text{C}^\beta\text{H}_2$ ), 37.61 ( $\text{CH}_2\text{Ph}$ ), 41.23 ( $\text{C}^\epsilon\text{H}_2$ ), 52.12 ( $\text{NCH}_2$ ), 52.80 ( $\text{OCH}_3$ ), 53.75 ( $\text{C}^\alpha\text{H}$ ), 55.91 ( $\text{C}^\alpha\text{H}$ ), 67.28 ( $\text{OCH}_2$ ), 81.61( $\text{C}(\text{CH}_3)_3$ ), 128.01 (CH arom Ph), 128.28 (CH arom Ph), 128.74 (CH arom Ph), 128.90 (CH arom Ph), 129.18 (CH arom Ph), 129.36 (CH arom Ph),

129.57 (CH arom Ph), 129.93 (CH arom Ph), 136.55 (C arom Ph), 137.07 (C arom Ph), 137.35 (C arom Ph), 156.46 (COOt-Bu), 157.19 (O=C-CH<sub>2</sub>Ph), 157.45 (O=C-NH), 171.20 (O=C-NH), 173.87 (COOCH<sub>3</sub>). **IR (CDCl<sub>3</sub>)**  $\tilde{\nu}_{\max}$  = 3374 cm<sup>-1</sup>, 3444 cm<sup>-1</sup> (NH), 1653 cm<sup>-1</sup>, 1674 cm<sup>-1</sup>, 1706 cm<sup>-1</sup>, 1721 cm<sup>-1</sup>, 1744 cm<sup>-1</sup> (C=O). **HRMS (ESI)** for [C<sub>37</sub>H<sub>47</sub>N<sub>5</sub>O<sub>8</sub>]: calculated [M+Na]<sup>+</sup> (m/z) 712.3322 found, 712.3339; calculated [M+K]<sup>+</sup> (m/z) 728.3062 found, 728.3042.

*Boc-D-Phe-azaPhe-Lys(z)-OMe (7f)* was obtained as a white foam (yield 62%) after flash chromatography (0.04–0.063  $\mu$ m) using (70% dichloromethane : 29% ethyl acetate : 1.0% methanol) as eluent; <sup>1</sup>H NMR (300 MHz, CDCl<sub>3</sub>, 10.0 mmol L<sup>-1</sup>)  $\delta_{\text{H}}$  1.37 (s, 9H, C(CH<sub>3</sub>)), 1.23-1.87 (m, 6H, (C <sup>$\beta$</sup> H<sub>2</sub>, C <sup>$\epsilon$</sup> H<sub>2</sub>, C <sup>$\delta$</sup> H<sub>2</sub>)), 2.71-2.79 and 2.93-3.00 (m, 2H, CH<sub>2</sub>), 3.18-3.23 (m, 2H, C <sup>$\epsilon$</sup> H<sub>2</sub>), 3.68 (s, 3H, COOCH<sub>3</sub>), 4.11-4.14 (m, 1H, C <sup>$\alpha$</sup> H), 4.37-4.44 (m, 1H, C <sup>$\alpha$</sup> H), 4.55 and 4.68 (br, 2H, NCH<sub>2</sub>), 4.75 (br s, 1H, NHBoc), 5.02 (s, 2H, CH<sub>2</sub>(Z)), 5.24-5.31 (br m, 1H, NHZ), 6.08 and 6.10 (br d, 1H, NH), 7.10-7.33 (m, 15H, H arom Ph), 7.78 (br s, 1H, NH). <sup>13</sup>C NMR (75 MHz, CDCl<sub>3</sub>, 10.0 mmol L<sup>-1</sup>)  $\delta$  23.37 (C <sup>$\gamma$</sup> H<sub>2</sub>), 28.90 (C(CH<sub>3</sub>)), 29.51 (C <sup>$\delta$</sup> H<sub>2</sub>), 31.70 (C <sup>$\beta$</sup> H<sub>2</sub>), 37.81 (CH<sub>2</sub>Ph), 41.01 (C <sup>$\epsilon$</sup> H<sub>2</sub>), 52.07 (NCH<sub>2</sub>), 52.78 (OCH<sub>3</sub>), 54.18 (C <sup>$\alpha$</sup> H), 56.18 (C <sup>$\alpha$</sup> H), 67.13 (OCH<sub>2</sub>), 81.09 (C(CH<sub>3</sub>)<sub>3</sub>), 128.15 (CH arom Ph), 128.30 (CH arom Ph), 128.69 (CH arom Ph), 129.17 (CH arom Ph), 129.52 (CH arom Ph), 129.73 (CH arom Ph), 136.11 (C arom Ph), 137.36 (C arom Ph), 156.95 (COOt-Bu), 157.22 (O=C-CH<sub>2</sub>Ph), 157.85 (O=C-NH), 171.10 (O=C-NH), 174.04 (COOCH<sub>3</sub>). **IR (CDCl<sub>3</sub>)**  $\tilde{\nu}_{\max}$  = 3376 cm<sup>-1</sup>, 3444 cm<sup>-1</sup> (NH), 1652 cm<sup>-1</sup>, 1673 cm<sup>-1</sup>, 1707 cm<sup>-1</sup>, 1720 cm<sup>-1</sup>, 1744 cm<sup>-1</sup> (C=O). **HRMS (ESI)** for [C<sub>37</sub>H<sub>47</sub>N<sub>5</sub>O<sub>8</sub>]: calculated [M+Na]<sup>+</sup> (m/z) 712.3322 found, 712.3327; calculated [M+K]<sup>+</sup> (m/z) 728.3062 found, 728.3028.

*Boc-(Phe-azaPhe-Ala)<sub>2</sub>-OMe (8a)* was obtained as a white solid (yield 87%) after flash chromatography (0.04 – 0.063  $\mu$ m) using (60% ethyl acetate : 40% petroleum ether) as eluent; m.p. 132 - 133 °C; <sup>1</sup>H NMR (300 MHz, CD<sub>3</sub>CN, 8.0 mmol L<sup>-1</sup>)  $\delta_{\text{H}}$  1.18 and 1.21 (d, 3H, CH<sub>3</sub>), 1.34-1.38 (m, 12H, CH<sub>3</sub> and C(CH<sub>3</sub>)<sub>3</sub>), 2.77-2.84 (m, 1H, CH<sub>2</sub>), 2.96-3.04 (m, 2H, CH<sub>2</sub>), 3.18-3.24 (m, 1H, CH<sub>2</sub>), 3.62 (s, 3H, COOCH<sub>3</sub>), 3.89-3.98 (m, 1H, C <sup>$\alpha$</sup> H), 4.02-4.09 (m, 1H, C <sup>$\alpha$</sup> H), 4.20-4.29 (m, 2H, 2\*C <sup>$\alpha$</sup> H), 4.48-4.84 (br m, 4H, 2\*NCH<sub>2</sub>), 5.62 (br s, 1H, NH), 6.37 (br s, 1H, NH), 6.53 (br s, 1H, NH), 7.17-7.32 (m, 21H: 20H, arom Ph, and 1H, NH), 9.01 (br s, 2H, 2\*NH). <sup>13</sup>C NMR (75 MHz, CD<sub>3</sub>CN, 10.0 mmol L<sup>-1</sup>)  $\delta_{\text{C}}$  17.33 (CH<sub>3</sub>), 18.02 (CH<sub>3</sub>), 28.62 (C(CH<sub>3</sub>)<sub>3</sub>), 37.46 (CH<sub>2</sub>), 37.59 (CH<sub>2</sub>), 50.52 (C <sup>$\alpha$</sup> H), 50.66 (C <sup>$\alpha$</sup> H), 52.75 (C <sup>$\alpha$</sup> H and COOCH<sub>3</sub>), 52.94 (NCH<sub>2</sub>), 53.32 (NCH<sub>2</sub>), 54.63 (C <sup>$\alpha$</sup> H), 81.3 (C(CH<sub>3</sub>)<sub>3</sub>), 127.81 (CH arom Ph), 128.30 (CH arom Ph), 128.78 (CH arom Ph), 129.19 (CH arom Ph), 129.34 (CH arom Ph), 129.53 (CH arom Ph), 129.70 (CH arom Ph), 129.83 (CH arom Ph), 130.20 (CH arom Ph), 130.28 (CH arom Ph), 130.37 (CH arom Ph), 130.68 (CH arom Ph), 137.61 (C arom Ph), 138.01 (C arom Ph), 138.52 (C arom Ph), 139.91 (C arom Ph), 158.03 (O=C-NH), 159.41 (O=C-NH), 171.4 (O=C-NH), 175.33 (COOCH<sub>3</sub>). **IR (CDCl<sub>3</sub>)**  $\tilde{\nu}_{\max}$  = 3259 cm<sup>-1</sup>, 3351 cm<sup>-1</sup>, 3401 cm<sup>-1</sup>, 3438 cm<sup>-1</sup> (NH), 1665 cm<sup>-1</sup>, 1700 cm<sup>-1</sup>, 1741 cm<sup>-1</sup> (C=O). **HRMS (ESI)** for [C<sub>46</sub>H<sub>56</sub>N<sub>8</sub>O<sub>9</sub>]: calculated [M+Na]<sup>+</sup> (m/z) 887.4062 found, 887.4068.

*Boc-(D-Phe-azaPhe-Ala)<sub>2</sub>-OMe (8b)* was obtained as a white solid (yield 85%) after flash chromatography (0.04 – 0.063  $\mu$ m) using (60% ethyl acetate : 40% petroleum ether) as eluent; m.p. 172 - 173 °C; <sup>1</sup>H NMR (300 MHz, CD<sub>3</sub>CN, 8.0 mmol L<sup>-1</sup>)  $\delta_{\text{H}}$  1.28 and 1.30 (d, 3H, CH<sub>3</sub>), 1.34 (s, 9H, C(CH<sub>3</sub>)<sub>3</sub>), 1.35 and 1.37 (d, 3H, CH<sub>3</sub>), 2.73-2.81 (m, 1H, CH<sub>2</sub>), 2.91-2.98 (m, 1H, CH<sub>2</sub>), 3.06-3.10 (m, 1H, CH<sub>2</sub>), 3.17-3.23 (m, 1H, CH<sub>2</sub>), 3.62 (s, 3H, COOCH<sub>3</sub>), 3.89-4.08 (m, 2H, 2\*C <sup>$\alpha$</sup> H), 4.10-4.24

(m, 2H, 2\* $C^{\alpha}H$ ), 4.33-4.67 (br m, 4H, 2\*NCH<sub>2</sub>), 5.62 (br s, 1H, NH), 6.45-6.57 (br, 2H, 2NH), 7.12-7.31 (m, 21H: 20H, arom Ph, and 1H, NH), 8.73 (s, 1H, NH), 9.13 (br s, 1H, NH). **<sup>13</sup>C NMR** (75 MHz, **CD<sub>3</sub>CN**, 10.0 mmol L<sup>-1</sup>)  $\delta_c$  17.11 (CH<sub>3</sub>), 18.11 (CH<sub>3</sub>), 28.70 (C(CH<sub>3</sub>)<sub>3</sub>), 36.81 (CH<sub>2</sub>), 37.36 (CH<sub>2</sub>), 50.52 (C $^{\alpha}H$ ), 52.27 (NCH<sub>2</sub>), 52.64 (C $^{\alpha}H$  and COOCH<sub>3</sub>), 52.86 (NCH<sub>2</sub>), 55.63 (C $^{\alpha}H$ ), 56.43 (C $^{\alpha}H$ ), 81.18 (C(CH<sub>3</sub>)<sub>3</sub>), 127.83 (CH arom Ph), 127.96 (CH arom Ph), 128.13 (CH arom Ph), 128.43 (CH arom Ph), 129.20 (CH arom Ph), 129.28 (CH arom Ph), 129.61 (CH arom Ph), 129.77 (CH arom Ph), 130.35 (CH arom Ph), 137.95 (C arom Ph), 138.41 (C arom Ph), 138.96 (C arom Ph), 158.32 (O=C-NH), 159.12 (O=C-NH), 171.26 (O=C-NH), 176.38 (COOCH<sub>3</sub>). **IR (CDCl<sub>3</sub>)**  $\tilde{\nu}_{max}$  = 3240 cm<sup>-1</sup>, 3351 cm<sup>-1</sup>, 3423 cm<sup>-1</sup> (NH), 1635 cm<sup>-1</sup>, 1665 cm<sup>-1</sup>, 1704 cm<sup>-1</sup>, 1741 cm<sup>-1</sup> (C=O). **HRMS (ESI)** for [C<sub>46</sub>H<sub>56</sub>N<sub>8</sub>O<sub>9</sub>]: calculated [M+Na]<sup>+</sup> (m/z) 887.4062 found, 887.4066.

Boc-(Lys(z)-azaPhe-Lys(z))<sub>2</sub>-OMe (**8c**) was obtained as a white foam (yield 64%) after flash chromatography (0.04 – 0.063  $\mu$ m) using (50% dichloromethane : 48% ethyl acetate : 2% methanol) as eluent; **<sup>1</sup>H NMR** (300 MHz, **CD<sub>3</sub>CN**, 8.0 mmol L<sup>-1</sup>)  $\delta_H$  1.37 (s, 9H, C(CH<sub>3</sub>)), 1.38-1.78 (m, 24H, 4\*(C $^{\beta}H_2$ , C $^{\epsilon}H_2$ , and C $^{\delta}H_2$ )), 3.02-3.09 (m, 8H, 4\*(C $^{\epsilon}H_2$ )), 3.64 (s, 3H, COOCH<sub>3</sub>), 3.66-3.69 (br m, 1H, C $^{\alpha}H$ ), 3.93-3.99 (m, 2H, 2\*C $^{\alpha}H$ ), 4.13-4.20 (m, 1H, C $^{\alpha}H$ ), 4.32-4.95 (br m, 4H, 2\*NCH<sub>2</sub>), 5.02 (s, 2H, CH<sub>2</sub>(Z)), 5.04 (s, 2H, CH<sub>2</sub>(Z)), 5.68 (br s, 2H, 2\*NHZ), 5.76 (br s, 1H, NHZ), 5.83 (br s, 1H, NHZ), 5.93 (br, 1H, NHBoc), 6.29 and 6.31 (d, 1H, NH), 6.53 (br s, 1H, NH), 7.03 (d, 1H, NH), 7.16-7.34 (m, 30H, H arom Ph), 8.91 (br s, 1H, NH), 9.02 (br s, 1H, NH). **<sup>13</sup>C NMR** (75 MHz, **CD<sub>3</sub>CN**, 10.0 mmol L<sup>-1</sup>)  $\delta_c$  23.21 (C $^{\gamma}H_2$ ), 24.06 (C $^{\gamma}H_2$ ), 28.77 (C(CH<sub>3</sub>)), 30.29 (C $^{\delta}H_2$ ), 31.11 (C $^{\delta}H_2$ ), 31.49 (C $^{\beta}H_2$ ), 32.19 (C $^{\beta}H_2$ ), 40.88 (C $^{\epsilon}H_2$ ), 41.43 (C $^{\epsilon}H_2$ ), 41.49 (C $^{\epsilon}H_2$ ), 41.62 (C $^{\epsilon}H_2$ ), 52.09 (NCH<sub>2</sub>), 52.56 (OCH<sub>3</sub>), 53.02 (NCH<sub>2</sub>), 54.91 (C $^{\alpha}H$ ), 66.74 (OCH<sub>2</sub>), 66.79 (OCH<sub>2</sub>), 66.88 (OCH<sub>2</sub>), 66.94 (OCH<sub>2</sub>), 81.15 (C(CH<sub>3</sub>)<sub>3</sub>), 128.22 (CH arom Ph), 128.60 (CH arom Ph), 128.73 (CH arom Ph), 128.83 (CH arom Ph), 128.89 (CH arom Ph), 128.95 (CH arom Ph), 129.33 (CH arom Ph), 129.52 (CH arom Ph), 130.22 (CH arom Ph), 138.50 (C arom Ph), 138.59 (C arom Ph), 138.67 (C arom Ph), 138.81 (C arom Ph), 157.50 (COOt-Bu), 157.81 (O=C-CH<sub>2</sub>Ph), 158.56 (O=C-CH<sub>2</sub>Ph), 159.80 (O=C-NH), 159.98 (O=C-NH), 172.07 (O=C-NH), 174.69 (COOCH<sub>3</sub>). **IR (CDCl<sub>3</sub>)**  $\tilde{\nu}_{max}$  = 3256 cm<sup>-1</sup>, 3349 cm<sup>-1</sup>, 3450 cm<sup>-1</sup> (NH), 1651 cm<sup>-1</sup>, 1667 cm<sup>-1</sup>, 1699 cm<sup>-1</sup>, 1712 cm<sup>-1</sup>, 1724 cm<sup>-1</sup>, 1740 cm<sup>-1</sup> (C=O). **HRMS (ESI)** for [C<sub>78</sub>H<sub>100</sub>N<sub>12</sub>O<sub>17</sub>]: calculated [M+Na]<sup>+</sup> (m/z) 1499.7227, found, 1499.7181; calculated [M<sup>2+</sup>+Na] (m/z) 761.3615, found 761.3664.

Boc-(D-Lys(z)-azaPhe-Lys(z))<sub>2</sub>-OMe (**8d**) was obtained as a white foam (yield 62%) after flash chromatography (0.04 – 0.063  $\mu$ m) using (50% dichloromethane : 48% ethyl acetate : 2% methanol) as eluent; **<sup>1</sup>H NMR** (300 MHz, **CDCl<sub>3</sub>**, 8.0 mmol L<sup>-1</sup>)  $\delta_H$  1.36 (s, 9H, C(CH<sub>3</sub>)), 1.37-1.77 (m, 24H, 4\*(C $^{\beta}H_2$ , C $^{\epsilon}H_2$ , and C $^{\delta}H_2$ )), 3.03-3.14 (m, 8H, 4\*(C $^{\epsilon}H_2$ )), 3.46 (s, 3H, COOCH<sub>3</sub>), 3.70-3.75 (br m, 1H, C $^{\alpha}H$ ), 3.87-3.93 (m, H, C $^{\alpha}H$ ), 4.04-4.08 (m, 1H, C $^{\alpha}H$ ), 4.56-4.60 (m, 1H, C $^{\alpha}H$ ), 4.21 (d) and 5.23 (br s) (2H, NCH<sub>2</sub>), 4.40 (d) and 4.64 (br s) (2H, NCH<sub>2</sub>), 4.82-4.87 (br s, 2H, 2\*NHZ), 5.05 (s, 2H, CH<sub>2</sub>(Z)), 5.07 (s, 2H, CH<sub>2</sub>(Z)), 5.10 (s, 2H, CH<sub>2</sub>(Z)), 5.11 (s, 2H, CH<sub>2</sub>(Z)), 5.3 (br s, 1H, NHZ), 5.46 (br, 1H, NHBoc), 5.88 (br s, 1H, NHZ), 6.21 and 6.23 (d, 1H, NH), 6.54 (br s, 1H, NH), 7.16-7.34 (m, 31H; 30H arom Ph and 1H, NH), 8.85 (br s, 1H, NH), 9.46 (br s, 1H, NH). **<sup>13</sup>C NMR** (75 MHz, **CDCl<sub>3</sub>**, 10.0 mmol L<sup>-1</sup>)  $\delta_c$  21.66 (C $^{\gamma}H_2$ ), 22.42 (C $^{\gamma}H_2$ ), 23.24 (C $^{\gamma}H_2$ ), 23.56 (C $^{\gamma}H_2$ ), 29.27 (C(CH<sub>3</sub>)), 29.58 (C $^{\delta}H_2$ ), 30.23 (C $^{\delta}H_2$ ), 30.39 (C $^{\delta}H_2$ ), 31.77 (C $^{\beta}H_2$ ), 32.18 (C $^{\beta}H_2$ ), 40.75 (C $^{\epsilon}H_2$ ), 40.83 (C $^{\epsilon}H_2$ ), 40.85 (C $^{\epsilon}H_2$ ), 40.99 (C $^{\epsilon}H_2$ ), 51.67 (NCH<sub>2</sub>), 52.29 (NCH<sub>2</sub>), 52.59 (OCH<sub>3</sub>), 53.45 (C $^{\alpha}H$ ), 55.32 (C $^{\alpha}H$ ), 56.59 (C $^{\alpha}H$ ),

56.93 (C<sup>α</sup>H), 66.93 (OCH<sub>2</sub>), 67.12 (OCH<sub>2</sub>), 67.44 (OCH<sub>2</sub>), 67.74 (OCH<sub>2</sub>), 81.65(C(CH<sub>3</sub>)<sub>3</sub>), 127.81 (CH arom Ph), 128.20 (CH arom Ph), 128.66 (CH arom Ph), 128.82 (CH arom Ph), 129.00 (CH arom Ph), 129.09 (CH arom Ph), 129.15 (CH arom Ph), 129.30 (CH arom Ph), 130.16 (CH arom Ph), 136.36 (C arom Ph), 136.91 (C arom Ph), 137.15 (C arom Ph), 137.52 (C arom Ph), 137.81 (C arom Ph), 157.17 (COOt-Bu), 157.44 (O=C-CH<sub>2</sub>Ph), 157.79 (O=C-CH<sub>2</sub>Ph), 157.96 (O=C-CH<sub>2</sub>Ph), 158.21(O=C-NH), 159.41 (O=C-NH), 171.13 (O=C-NH), 171.62 (O=C-NH), 175.8 (COOCH<sub>3</sub>). IR (CDCl<sub>3</sub>)  $\tilde{\nu}_{\max}$  = 3212 cm<sup>-1</sup>, 3342 cm<sup>-1</sup>, 3450 cm<sup>-1</sup> (NH), 1637 cm<sup>-1</sup>, 1652 cm<sup>-1</sup>, 1667 cm<sup>-1</sup>, 1690 cm<sup>-1</sup>, 1705 cm<sup>-1</sup>, 1718 cm<sup>-1</sup>, 1738 cm<sup>-1</sup> (C=O). HRMS (ESI) for [C<sub>78</sub>H<sub>100</sub>N<sub>12</sub>O<sub>17</sub>]: calculated [M+Na]<sup>+</sup> (m/z) 1499.7227, found, 1499.7153; calculated [M<sup>2+</sup>+Na] (m/z) 761.3615, found 761.3592.

**Table S1.** Assignment of the CO groups in **7c** and **7d**, (3.0 mmol L<sup>-1</sup>, CDCl<sub>3</sub>)

| CO Molecule <b>7c</b>          | Free methyl ester | Free Lys1 | Free CO(Z) (Lys1+Lys2) | Free Boc              | Free azaPhe | Bound Boc |
|--------------------------------|-------------------|-----------|------------------------|-----------------------|-------------|-----------|
| Wavenumber (cm <sup>-1</sup> ) | 1748              | 1735      | 1717                   | 1701                  | 1677        | 1652      |
| CO Molecule <b>7d</b>          | Free methyl ester | Free Lys1 | Free CO(Z) D-Lys1      | Free CO(z) Lys2 + Boc | Free azaPhe | Bound Boc |
| Wavenumber (cm <sup>-1</sup> ) | 1749              | 1734      | 1718                   | 1702                  | 1675        | 1652      |

**Table S2.** Mean values of the dihedral angles of molecules (**7c**) and (**7d**) calculated from 25.000 structures issued of the molecular dynamic simulations *versus* the classical values of  $\beta$ -turns in natural peptides

|                    | $\Phi 1$ | $\Psi 1$ | $\Phi 2$ | $\Psi 2$ | $\Phi 3$ | $\Psi 3$ |
|--------------------|----------|----------|----------|----------|----------|----------|
| Molecule <b>7c</b> | -29.70°  | 26.37°   | -89.07°  | 47.89°   | -138.60° | 125.56°  |
| Molecule <b>7d</b> | 128.40°  | -64.94°  | 91.81°   | 38.83°   | -146.91° | 125.82°  |
| $\beta$ IV-turn    | -61°     | 10°      | -53°     | 17°      | --       | --       |
| $\beta$ I'-turn    | 60°      | 30°      | 90°      | 0°       | --       | --       |

**Table S3.** The possible intramolecular hydrogen bonds predicted from 25.000 structures in (**7c**) and (**7d**) issued of the molecular dynamic simulations

| Molecule  | Bond Ref. | Residue       | Residue                 | Distance (Å)<br>N-----O | Angle (°) | H-bond (%) |
|-----------|-----------|---------------|-------------------------|-------------------------|-----------|------------|
| <b>7c</b> | i         | CO (i)        | HN (i + 2)              | 2.86                    | 139.5     | 36         |
|           | ii        | CO (i + 2)    | HN <sup>E</sup> (i + 3) | 2.96                    | 159.04    | 35         |
| <b>7d</b> | i         | CO(Z) (i + 3) | HN (i + 2)              | 2.89                    | 162.01    | 40         |
|           | ii        | CO(Z) (i + 3) | HN (i + 1)              | 2.91                    | 158.44    | 26         |
|           | iii       | CO (i)        | HN <sup>E</sup> (i + 1) | 2.98                    | 159.42    | 22         |



**Table S4.** Mean dihedral angles of molecules (**8c**) and (**8d**) calculated from 25.000 structures obtained by the molecular dynamic simulations versus the classical torsion angles in peptides and proteins

| Torsion angles in ( <b>8c</b> ) and ( <b>8d</b> ) |          |          |          |          |          |          |          |          |          |          |
|---------------------------------------------------|----------|----------|----------|----------|----------|----------|----------|----------|----------|----------|
| Compound                                          | $\Phi 1$ | $\Psi 1$ | $\Phi 2$ | $\Psi 2$ | $\Phi 3$ | $\Psi 3$ | $\Phi 4$ | $\Psi 4$ | $\Phi 5$ | $\Psi 5$ |
| <b>8c</b>                                         | -85.81°  | 23.79°   | 86.23°   | -68.93°  | -66.15°  | 26.77°   | -129.05° | 13.11°   | -88.26°  | 21.62°   |
| <b>8d</b>                                         | 83.43°   | -27.38°  | 79.51°   | -112.39° | -68.92°  | 5.67°    | 131.28°  | 30.66°   | 97.04°   | -9.78°   |

Classical torsion angles in peptides and proteins

| Turn        | $\varphi_i$ | $\psi_i$ | $\varphi_{i+1}$ | $\psi_{i+1}$ |
|-------------|-------------|----------|-----------------|--------------|
| $\beta I'$  | 60°         | 30°      | 90°             | 0°           |
| $\beta II'$ | 60°         | -120°    | -80°            | 0°           |
| $\beta IV$  | -61°        | 10°      | -53             | 17°          |
| $\beta V$   | -80°        | 80°      | 80°             | -80°         |
| $\beta V'$  | 80°         | -80°     | -80°            | 80°          |

**Table S5.** Mean values of the bond distances and bond angles for the predicted intramolecular hydrogen bonds calculated from 25.000 structures in **(8c)** and **(8d)** obtained by the molecular dynamic simulations

| Intramolecular H-bonds in compounds (8c) and (8d) |           |               |                          |                         |             |            |
|---------------------------------------------------|-----------|---------------|--------------------------|-------------------------|-------------|------------|
| Molecule                                          | Bond Ref. | Residue       | Residue                  | Distance (Å)<br>N-----O | Angle ( ° ) | H-bond (%) |
| <b>8c</b>                                         | i         | CO (i+2)      | NH (i + 4)               | 2.78                    | 146.35      | 90.8       |
|                                                   | ii        | CO (i + 1)    | N <sup>ε</sup> H (i + 4) | 2.91                    | 157.18      | 64.9       |
|                                                   | iii       | CO (i)        | NH (i + 2)               | 2.89                    | 140.85      | 48.9       |
|                                                   | iv        | CO (i+2)      | NH (i + 5)               | 3.02                    | 147.36      | 32.9       |
| <b>8d</b>                                         | i         | CO (i + 1)    | NH (i + 5)               | 2.97                    | 149.60      | 59.1       |
|                                                   | ii        | CO(z) (i + 6) | NH (i + 1)               | 2.90                    | 156.03      | 58.7       |
|                                                   | iii       | CO (i + 2)    | NH (i + 4)               | 2.94                    | 137.64      | 38.8       |
|                                                   | iv        | CO (i)        | NH (i + 2)               | 2.84                    | 143.62      | 29.5       |
|                                                   | v         | CO(z) (i + 4) | N <sup>ε</sup> H (i + 1) | 2.95                    | 159.04      | 26.9       |
|                                                   | vi        | CO (i + 5)    | N <sup>ε</sup> H (i + 3) | 2.94                    | 155.21      | 23.0       |

**Table S6.** Average percentages of the expected intramolecular hydrogen bonds in **(8c)** obtained by the molecular dynamic simulations

| Molecule  | Bond Ref.  | No. of frames | Frames (%) | Bond Ref.           | No. of frames | Frames (%) |
|-----------|------------|---------------|------------|---------------------|---------------|------------|
| <b>8c</b> | (i + ii)   | 15115         | 60.5       | (i + ii + iii)      | 7368          | 29.5       |
|           | (i + iii)  | 11154         | 44.6       | (i + iii + iv)      | 3607          | 14.4       |
|           | (i + iv)   | 6952          | 27.8       | (i + ii + iv)       | 4282          | 17.3       |
|           | (ii + iii) | 7892          | 31.8       | (ii + iii + iv)     | 2560          | 10.2       |
|           | (ii + iv)  | 4921          | 19.7       | (i + ii + iii + iv) | 2259          | 9.0        |
|           | (iii + iv) | 4215          | 16.9       |                     |               |            |

**Table S7.** Average percentages of the expected intramolecular hydrogen bonds in **(8d)** obtained by the molecular dynamic simulations

| Molecule  | Bond Ref.  | No. of frames | Frames (%) | Bond Ref.               | No. of frames | Frames (%) |
|-----------|------------|---------------|------------|-------------------------|---------------|------------|
| <b>8d</b> | (i + ii)   | 8941          | 35.8       | (iv + v)                | 2614          | 10.5       |
|           | (i + iii)  | 3069          | 12.3       | (iv + vi)               | 1775          | 7.1        |
|           | (i + iv)   | 5439          | 21.8       | (v + vi)                | 1997          | 8.0        |
|           | (i + v)    | 4378          | 17.5       | (i + ii + iii)          | 1862          | 7.5        |
|           | (i + vi)   | 2306          | 9.2        | (i + iii + iv)          | 1142          | 4.5        |
|           | (ii + iii) | 4257          | 17.0       | (i + ii + iv)           | 2972          | 11.9       |
|           | (ii + iv)  | 4753          | 19.0       | (ii + iii + iv)         | 1405          | 5.6        |
|           | (ii + v)   | 4363          | 17.4       | (iv + v +vi)            | 766           | 3.0        |
|           | (ii + vi)  | 4219          | 16.9       | (i + ii + iii + iv)     | 650           | 2.6        |
|           | (iii + iv) | 2871          | 11.5       | (ii + iii + iv + v)     | 582           | 2.3        |
|           | (iii + v)  | 2314          | 9.2        | (i + iv + v + vi)       | 473           | 1.9        |
|           | (iii + vi) | 2277          | 9.1        | (i + ii + iii + vi + v) | 402           | 1.6        |

**Table S8.** Membrane permeation properties for CO<sub>2</sub> and N<sub>2</sub> pure gases at 35 °C and 2 bar

|  | Pseudopeptide oligomer     | P (CO <sub>2</sub> ) (Barrer) | P (N <sub>2</sub> ) (Barrer) | D (CO <sub>2</sub> ) x 10 <sup>6</sup> (cm <sup>2</sup> /s) | D (N <sub>2</sub> ) x 10 <sup>7</sup> (cm <sup>2</sup> /s) | S (CO <sub>2</sub> ) x 10 <sup>2</sup> (cm <sup>3</sup> (STP).cm <sup>-3</sup> .cmHg <sup>-1</sup> ) | S (N <sub>2</sub> ) x 10 <sup>4</sup> (cm <sup>3</sup> (STP).cm <sup>-3</sup> .cmHg <sup>-1</sup> ) |
|--|----------------------------|-------------------------------|------------------------------|-------------------------------------------------------------|------------------------------------------------------------|------------------------------------------------------------------------------------------------------|-----------------------------------------------------------------------------------------------------|
|  | <b>Pebax 1074</b>          | 132.67 ± 0.52                 | 3.10 ± 0.17                  | 1.19 ± 0.02                                                 | 3.76 ± 0.40                                                | 1.12 ± 0.02                                                                                          | 8.31 ± 1.10                                                                                         |
|  | <b>Trimer without Lys</b>  |                               |                              |                                                             |                                                            |                                                                                                      |                                                                                                     |
|  | <b>7a</b>                  | 116.00 ± 0.17                 | 2.58 ± 0.05                  | 1.10 ± 0.04                                                 | 4.11 ± 0.52                                                | 1.09 ± 0.05                                                                                          | 6.39 ± 0.91                                                                                         |
|  | <b>Protected hexamer</b>   |                               |                              |                                                             |                                                            |                                                                                                      |                                                                                                     |
|  | <b>8c</b>                  | 115.28 ± 0.24                 | 3.00 ± 0.00                  | 1.03 ± 0.02                                                 | 3.96 ± 0.34                                                | 1.16 ± 0.06                                                                                          | 7.58 ± 0.55                                                                                         |
|  | <b>Protected trimer</b>    |                               |                              |                                                             |                                                            |                                                                                                      |                                                                                                     |
|  | <b>7c</b>                  | 119.23 ± 0.15                 | 2.66 ± 0.29                  | 1.13 ± 0.01                                                 | 2.41 ± 0.18                                                | 1.05 ± 0.01                                                                                          | 10.39 ± 0.68                                                                                        |
|  | <b>Protected dimer</b>     |                               |                              |                                                             |                                                            |                                                                                                      |                                                                                                     |
|  | <b>6b</b>                  | 122.48 ± 1.39                 | 2.60 ± 0.00                  | 1.05 ± 0.05                                                 | 3.09 ± 0.50                                                | 1.16 ± 0.05                                                                                          | 8.57 ± 1.31                                                                                         |
|  | <b>Deprotected hexamer</b> |                               |                              |                                                             |                                                            |                                                                                                      |                                                                                                     |
|  | <b>8c'*</b>                | 123.85 ± 0.31                 | 3.35 ± 0.35                  | 0.85 ± 0.02                                                 | 6.16 ± 0.93                                                | 1.47 ± 0.04                                                                                          | 5.59 ± 1.41                                                                                         |
|  | <b>Deprotected trimer</b>  |                               |                              |                                                             |                                                            |                                                                                                      |                                                                                                     |
|  | <b>7c'*</b>                | 133.20 ± 0.14                 | 3.06 ± 0.06                  | 0.92 ± 0.01                                                 | 5.40 ± 0.38                                                | 1.46 ± 0.02                                                                                          | 5.71 ± 0.33                                                                                         |
|  | <b>Deprotected dimer</b>   |                               |                              |                                                             |                                                            |                                                                                                      |                                                                                                     |
|  | <b>6b'*</b>                | 147.65 ± 0.13                 | 3.10 ± 0.00                  | 1.35 ± 0.03                                                 | 3.68 ± 0.13                                                | 1.10 ± 0.02                                                                                          | 8.42 ± 0.24                                                                                         |

\*Deprotected azapeptides **6b'**, **7b'** and **8b'** have obtained from the corresponding protected analogues by catalytic hydrogenolysis (See Experimental Section).

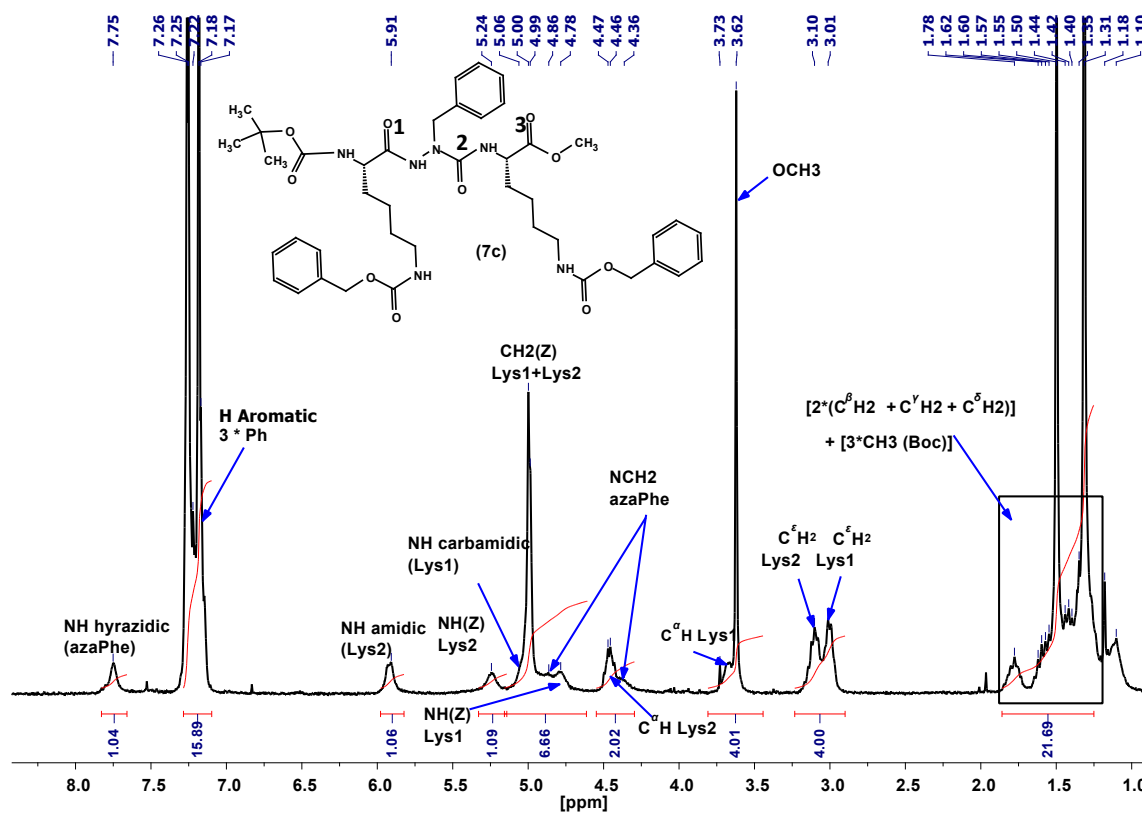

Figure S1a. The  $^1\text{H}$  spectrum of **7c**; (3.0 mmol L $^{-1}$ , CDCl $_3$ , 300 K).

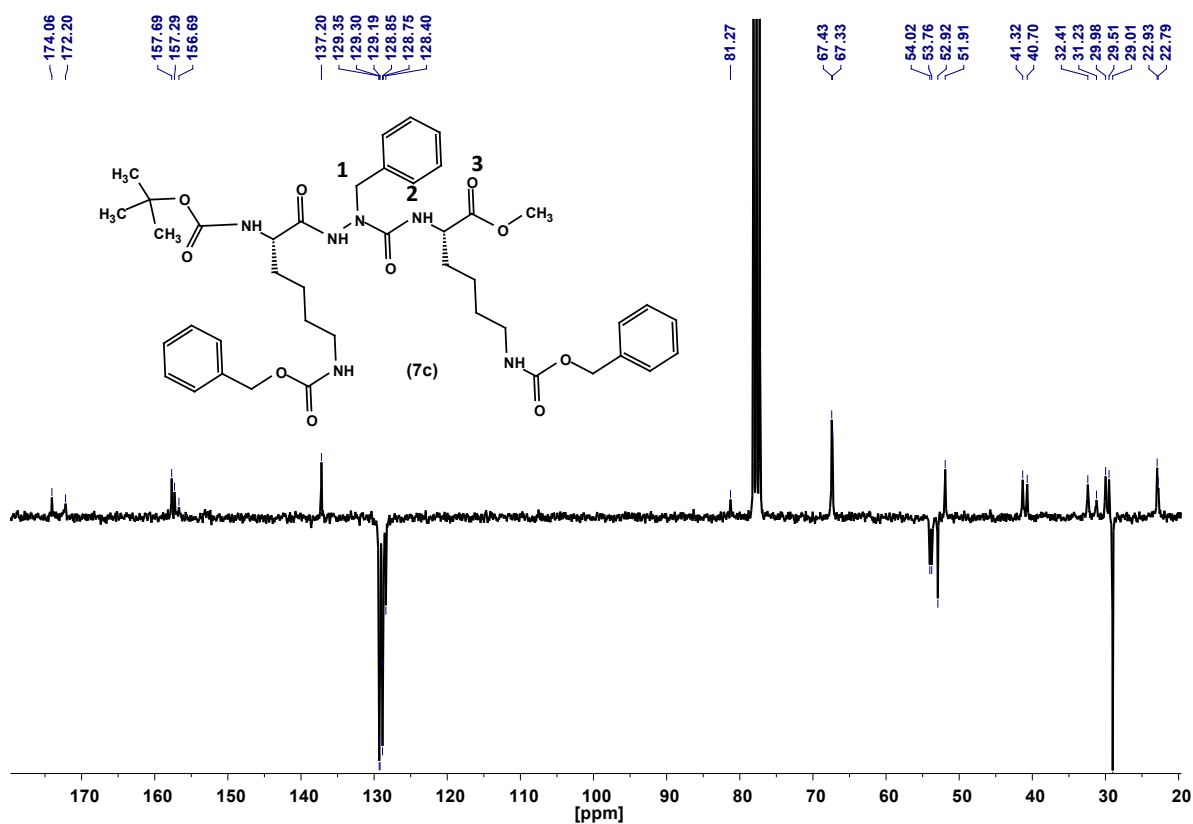

Figure S1b. The  $^{13}\text{C}$  spectrum of **7c**; (5.0 mmol L $^{-1}$ , CDCl $_3$ , 300 K).

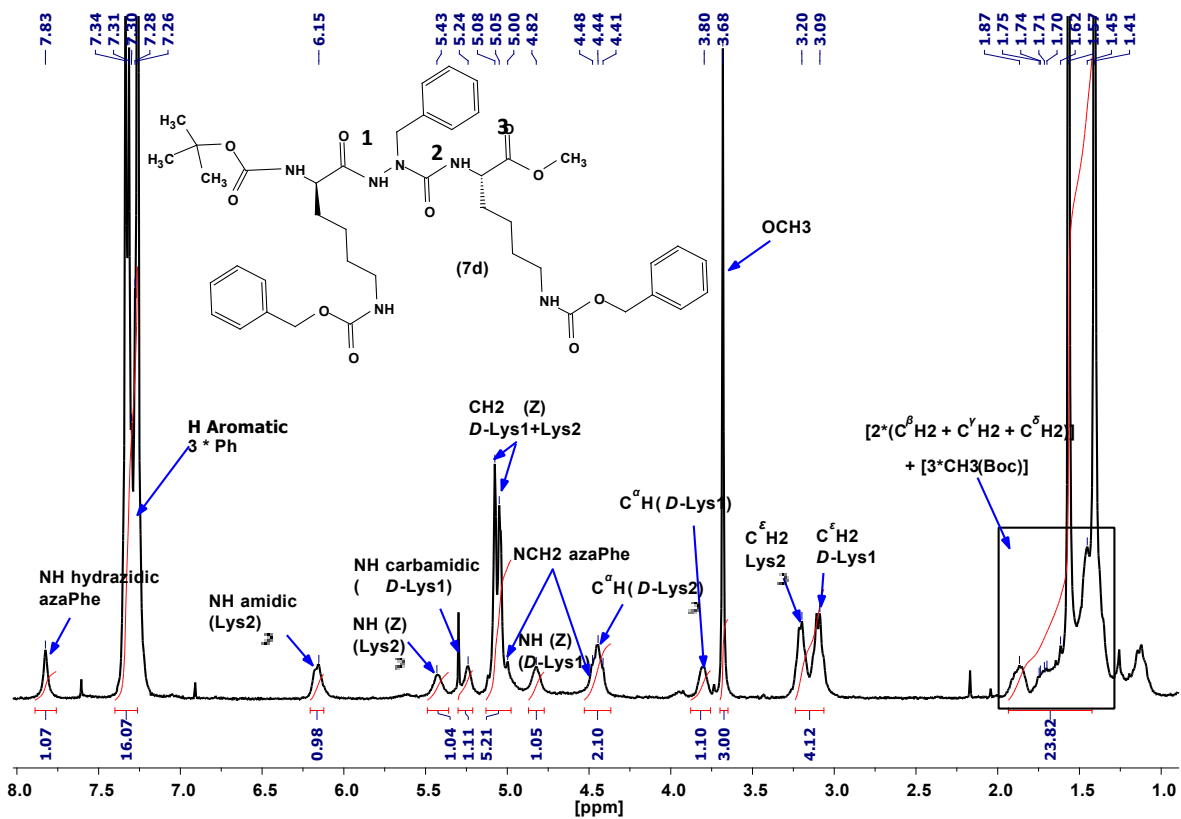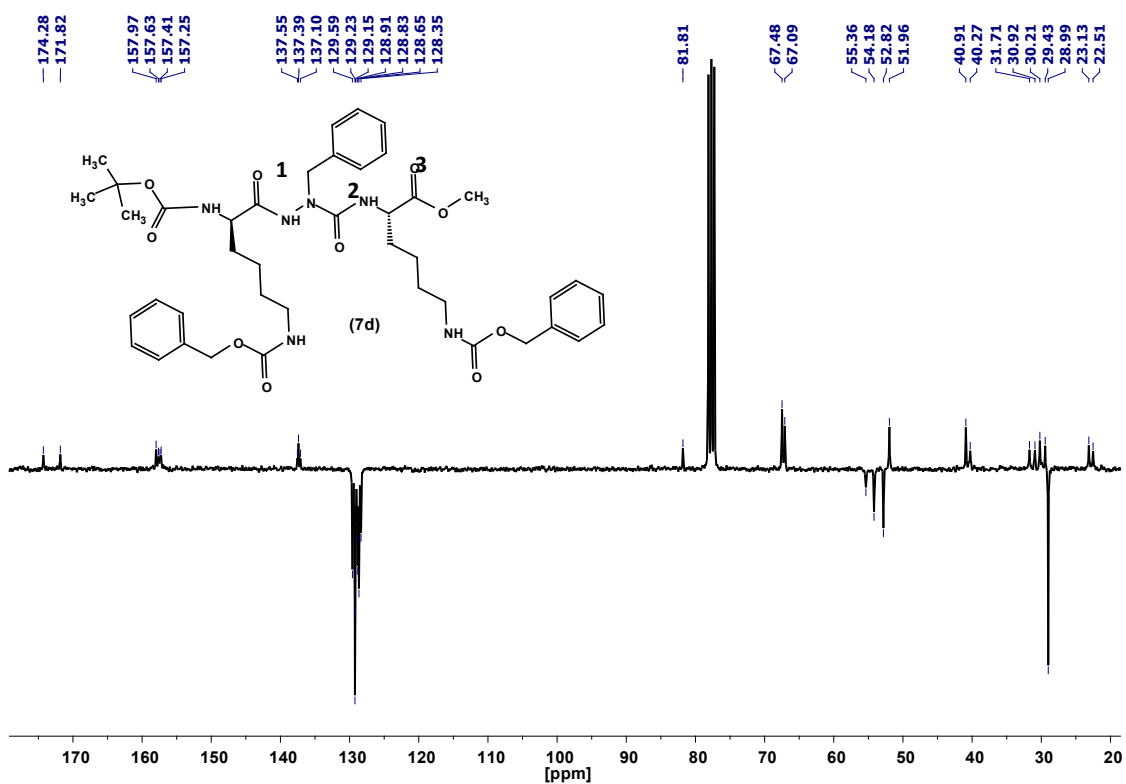

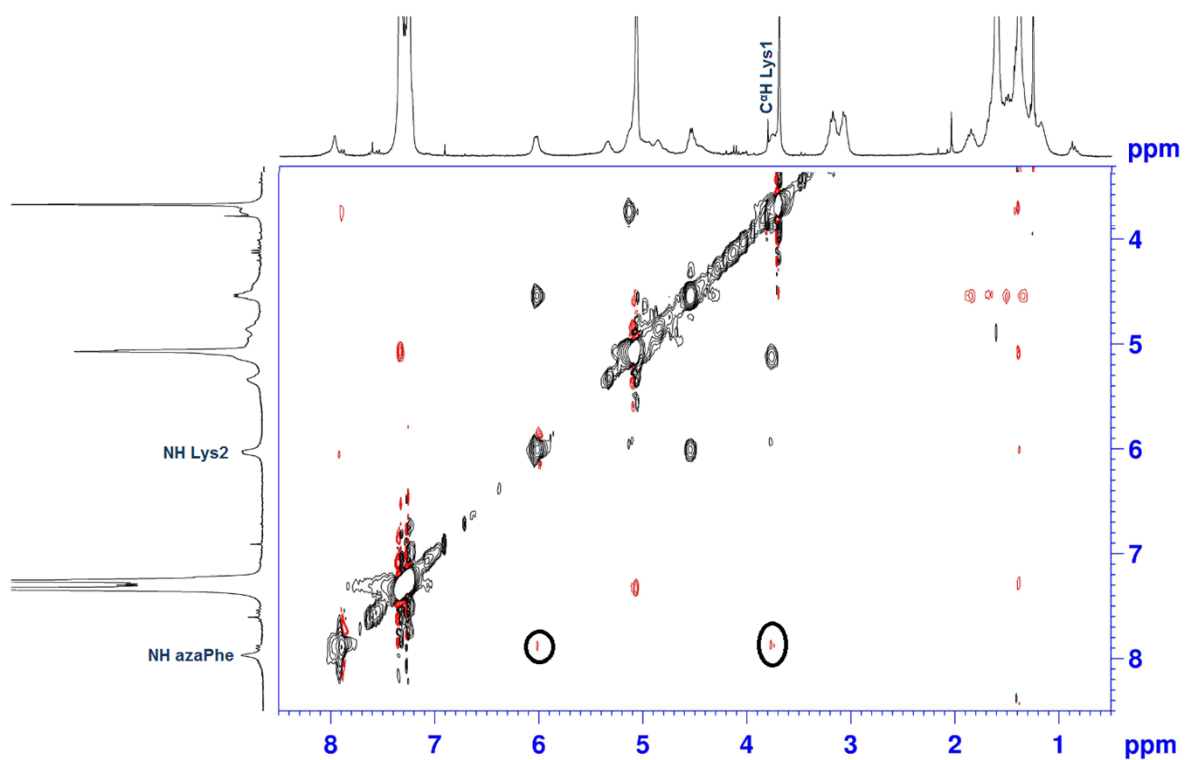

**Figure S3.** The 2D ROESY spectrum illustrating the correlations of  $\beta$ II-turn conformation in **7c** (300 MHz, 3.0 mmol L<sup>-1</sup>, CDCl<sub>3</sub>, 300 K).

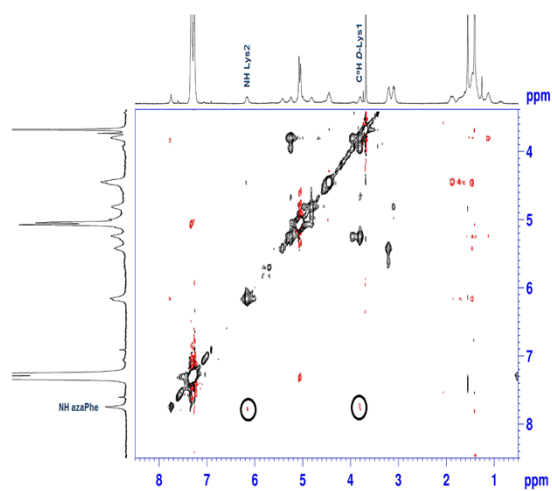

**Figure S4.** The 2D ROESY spectrum illustrating the correlations of  $\beta$ II'-turn conformation in **7d** (300 MHz, 3.0 mmol L<sup>-1</sup>, CDCl<sub>3</sub>, 300 K).

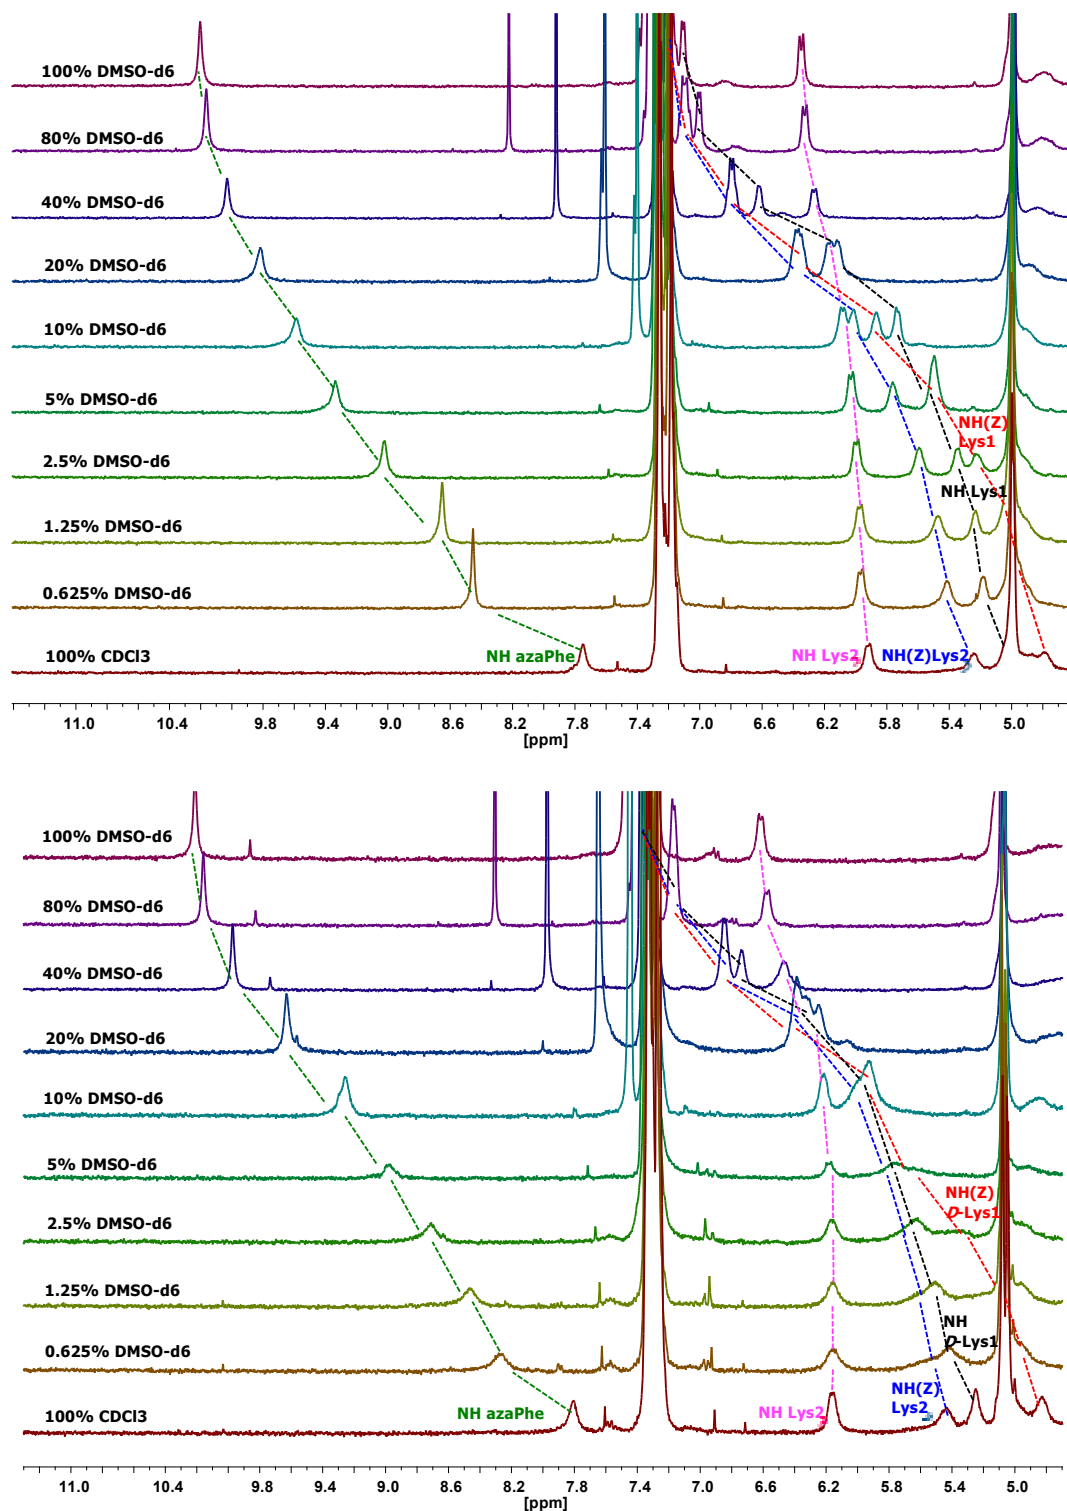

**Figure S5.** Chemical shift-variations ( $\delta$ ) ppm of NH protons for: **7c** (up); and **7d** (bottom) as a function of % [CDCl<sub>3</sub>/DMSO-*d*<sub>6</sub>] mixtures; (300 MHz, 3.0 mmol L<sup>-1</sup>).

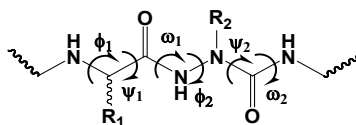

**Figure S6.** Nomenclature used for the backbone dihedral angles of four oligomers (**7c**, **7d**, **8c** and **8d**).



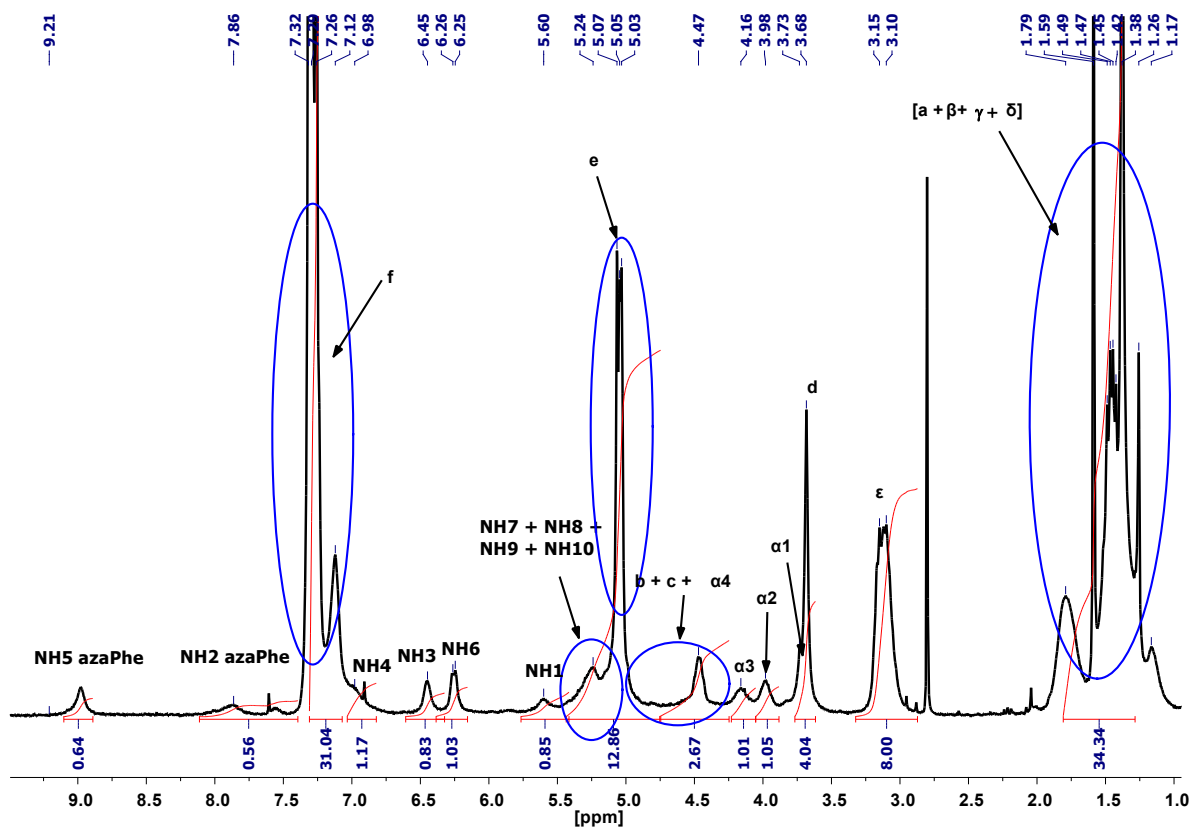

Figure S7. The  $^1\text{H}$  spectrum of **8c** ( $4.0 \text{ mmol L}^{-1}$ ,  $\text{CDCl}_3$ , 300 K).

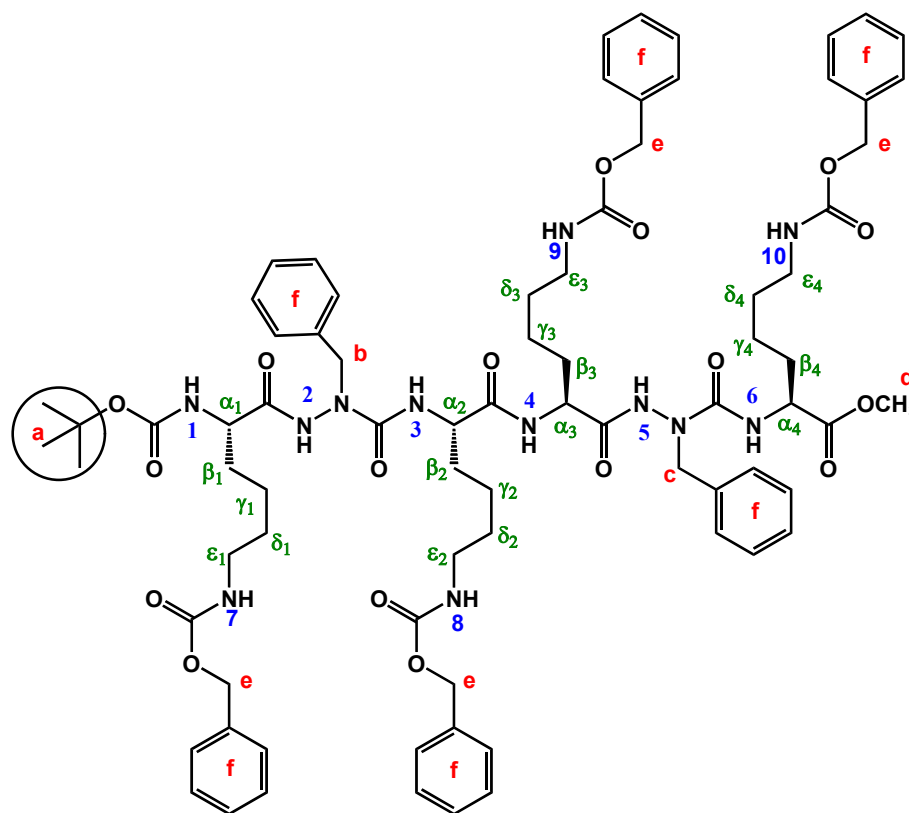

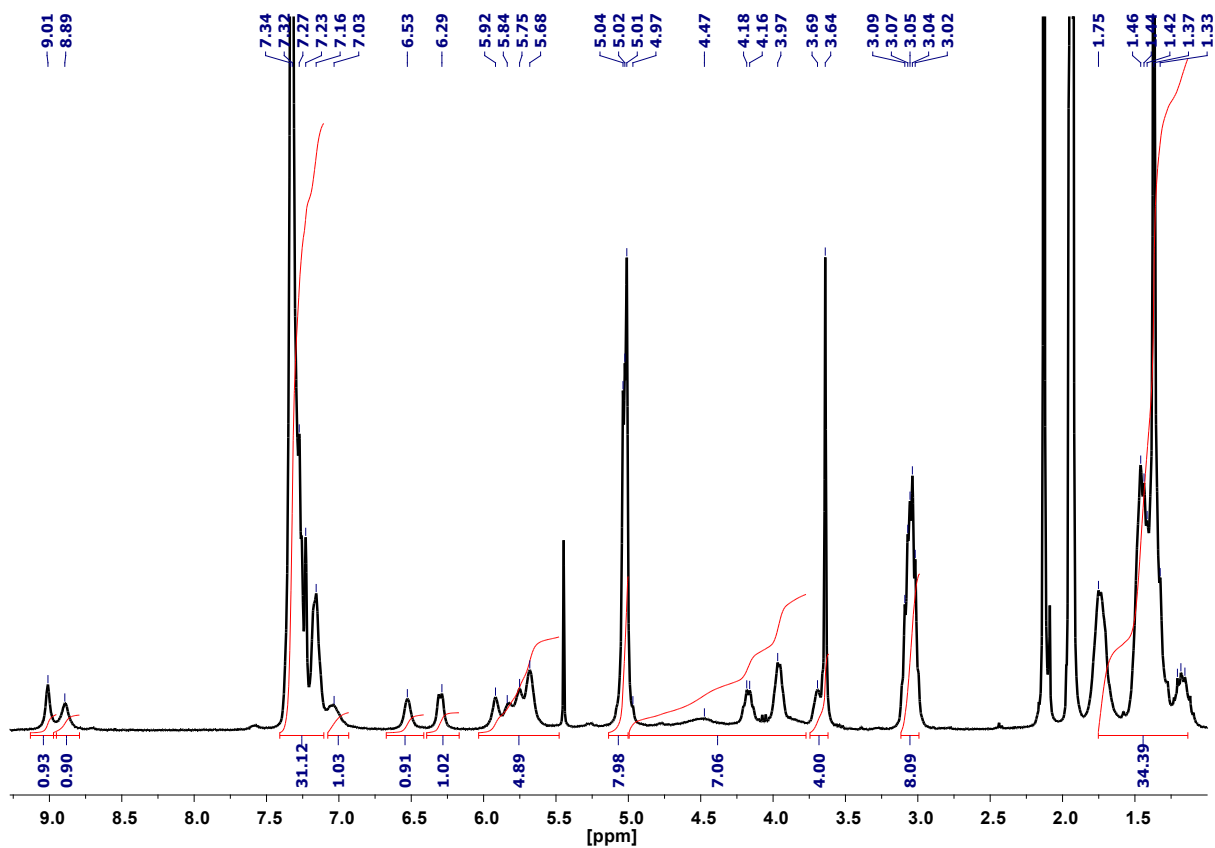

Figure S8a. The  $^1\text{H}$  spectrum of **8c** ( $4.0 \text{ mmol L}^{-1}$ ,  $\text{CD}_3\text{CN}$ , 300 K).

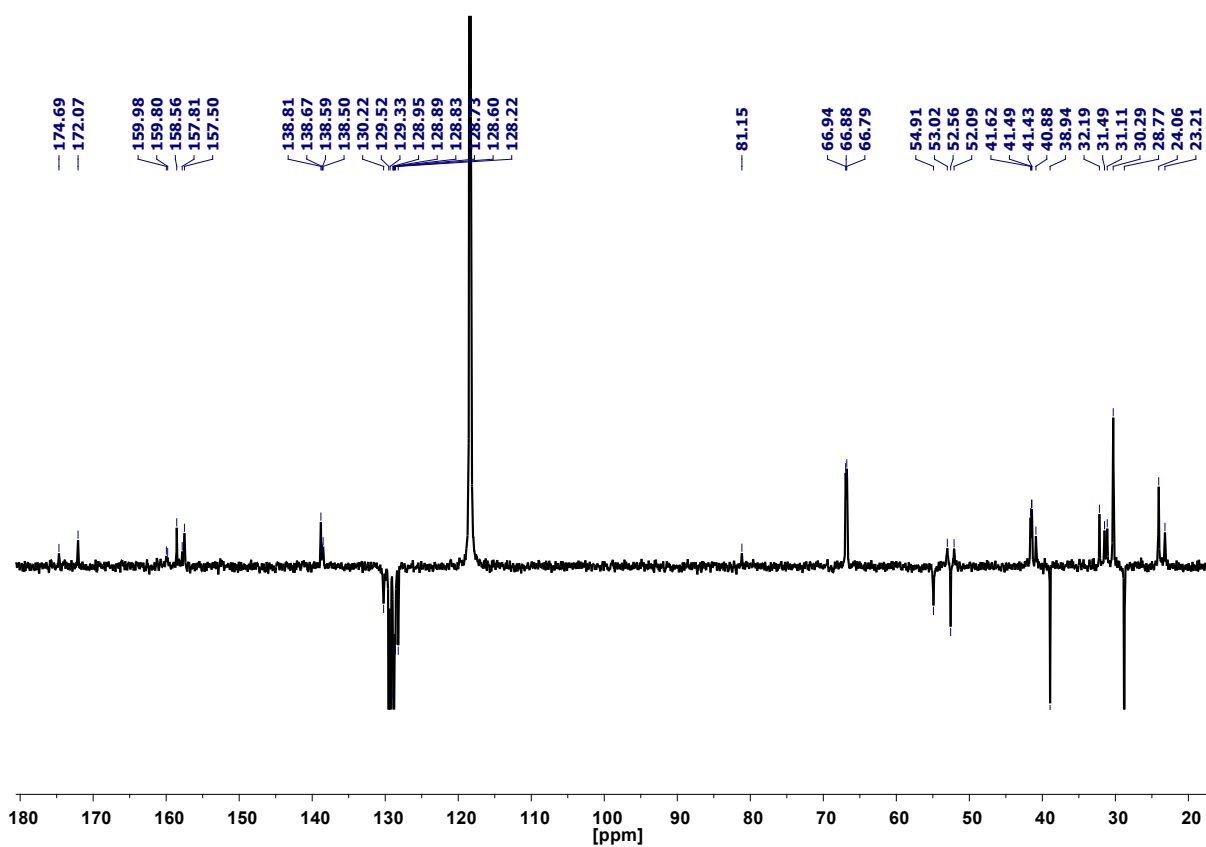

Figure S8b. The  $^{13}\text{C}$  spectrum of **8c** ( $4.0 \text{ mmol L}^{-1}$ ,  $\text{CD}_3\text{CN}$ , 300 K).

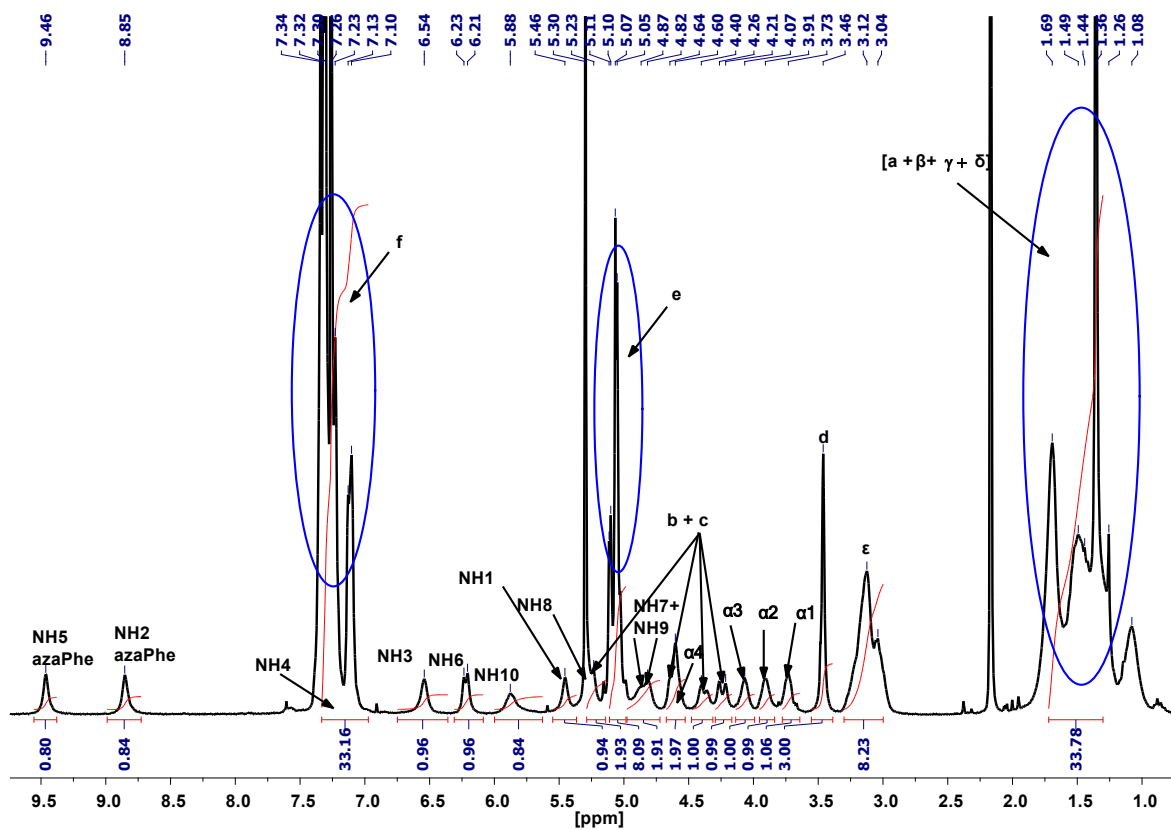

Figure S9a. The  $^1\text{H}$  spectrum of **8d** ( $4.0 \text{ mmol L}^{-1}$ ,  $\text{CDCl}_3$ , 300 K).

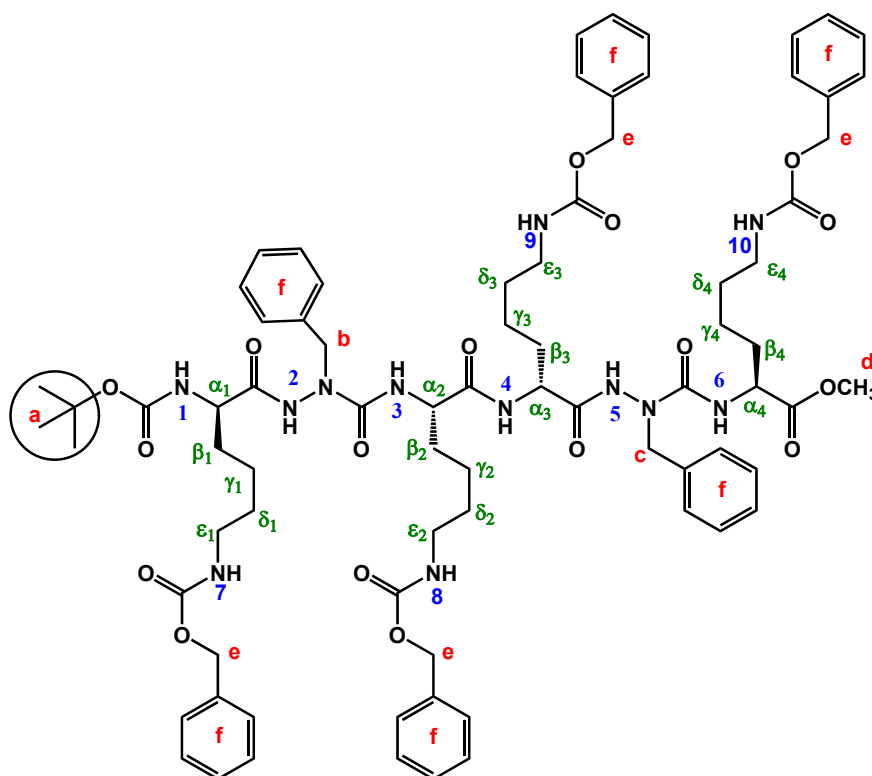

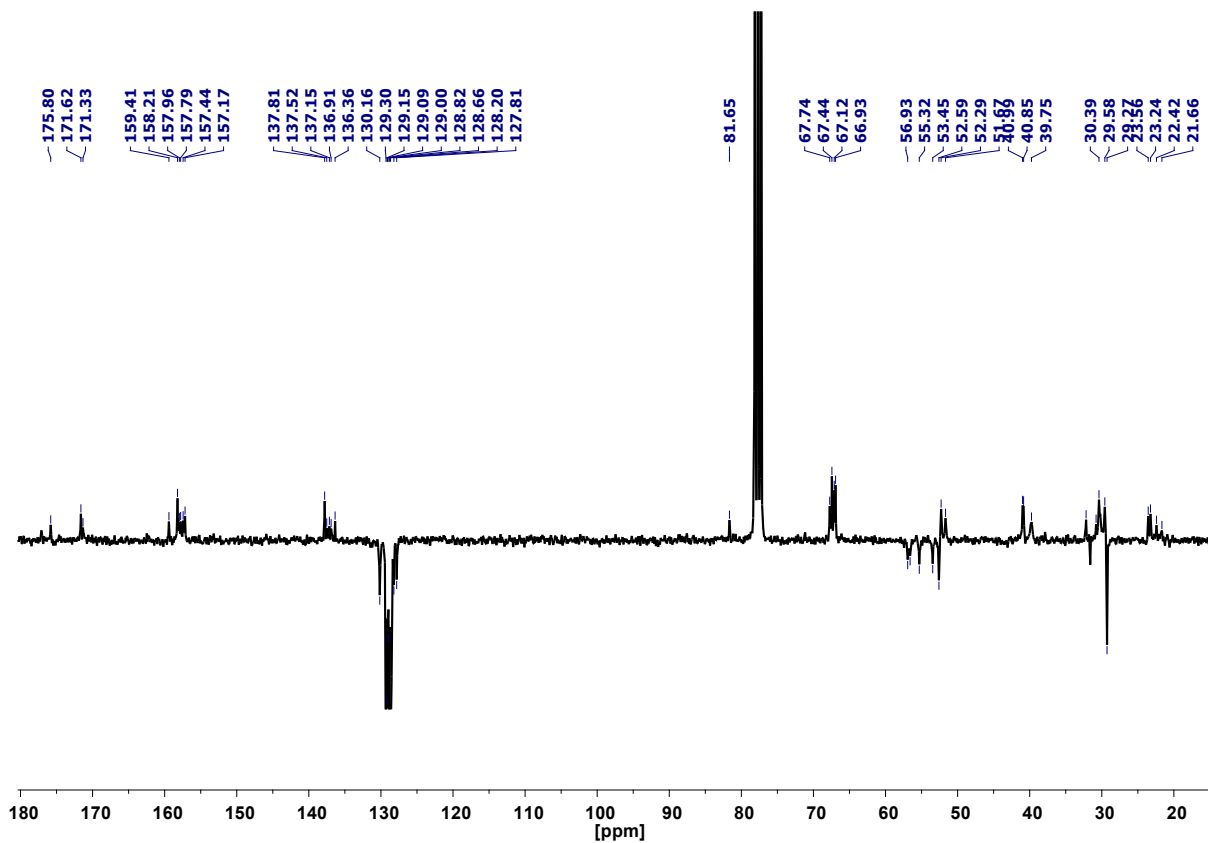

Figure S9b. The  $^{13}\text{C}$  spectrum of **8d** (5.0 mmol L $^{-1}$ ,  $\text{CDCl}_3$ , 300 K).

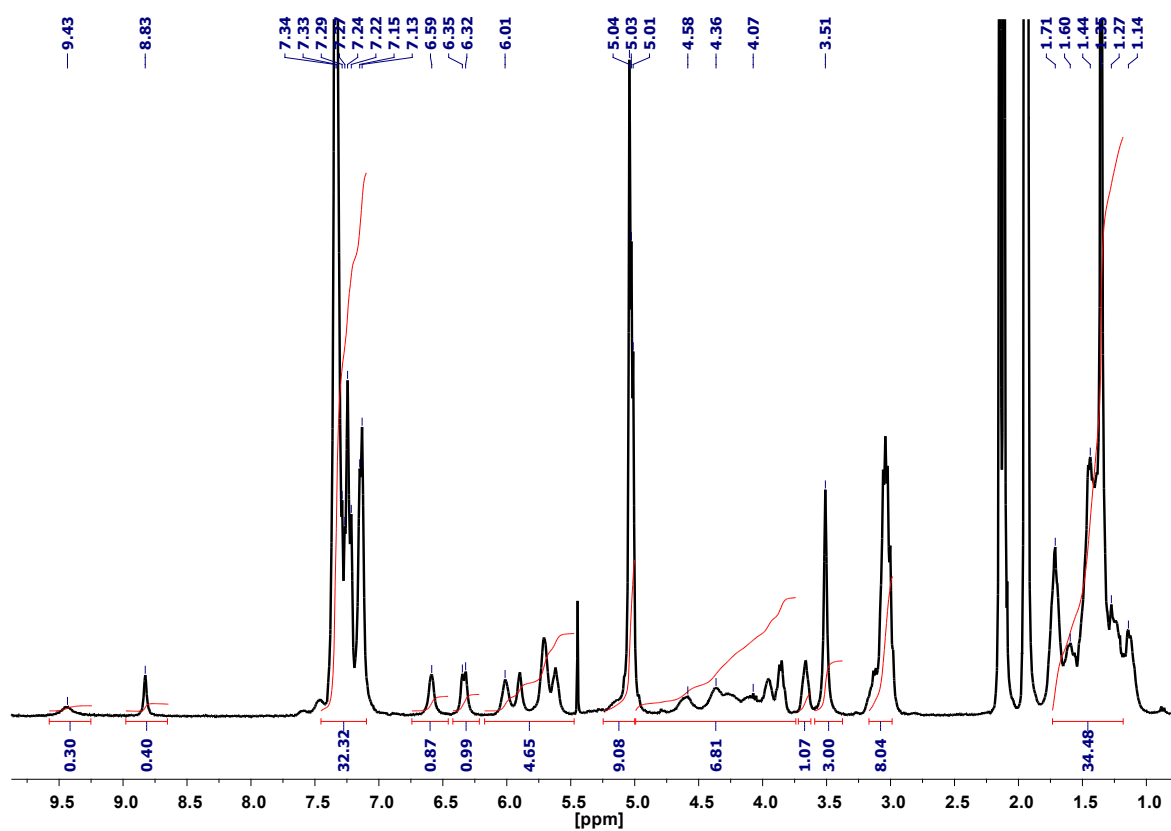

Figure S10. The  $^1\text{H}$  spectrum of **8d** (4.0 mmol L $^{-1}$ ,  $\text{CD}_3\text{CN}$ , 300 K).

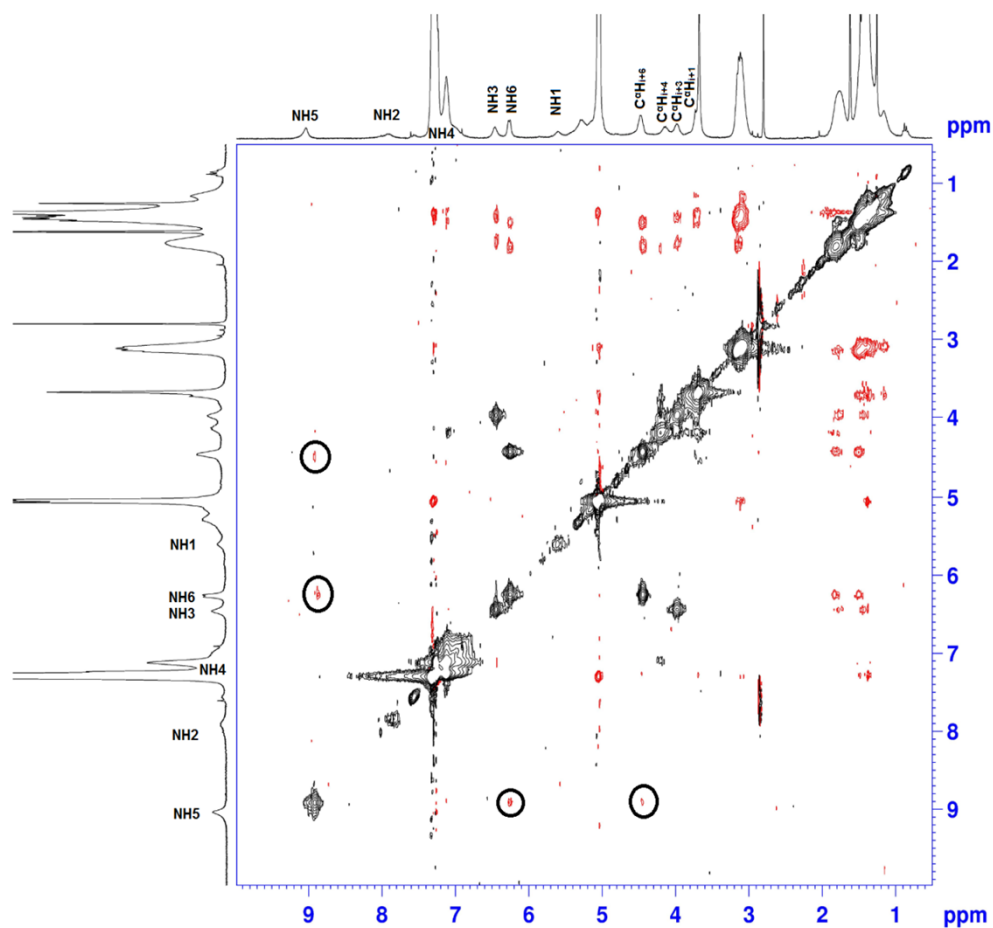

**Figure S11.** The 2D ROESY spectrum illustrating the  $\beta$ -turn conformation in **8c**; (300 MHz, 4.0 mmol L<sup>-1</sup>, CDCl<sub>3</sub>, 300 K).

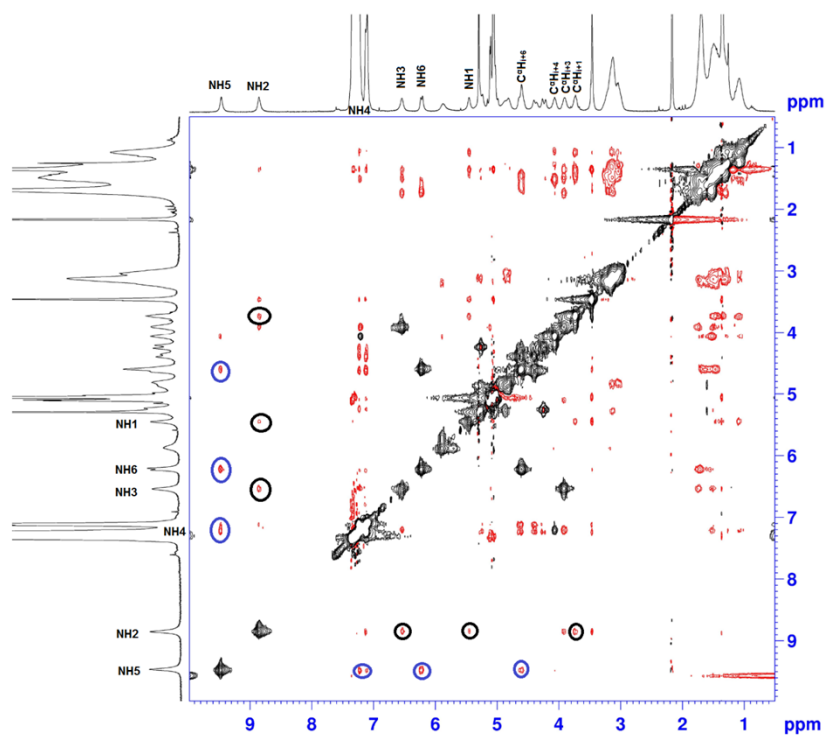

**Figure S12.** The 2D ROESY spectrum illustrating the correlations of  $\beta$ -turn conformation in **8d**, (300 MHz, 4.0 mmol L<sup>-1</sup>, CDCl<sub>3</sub>, 300 K).

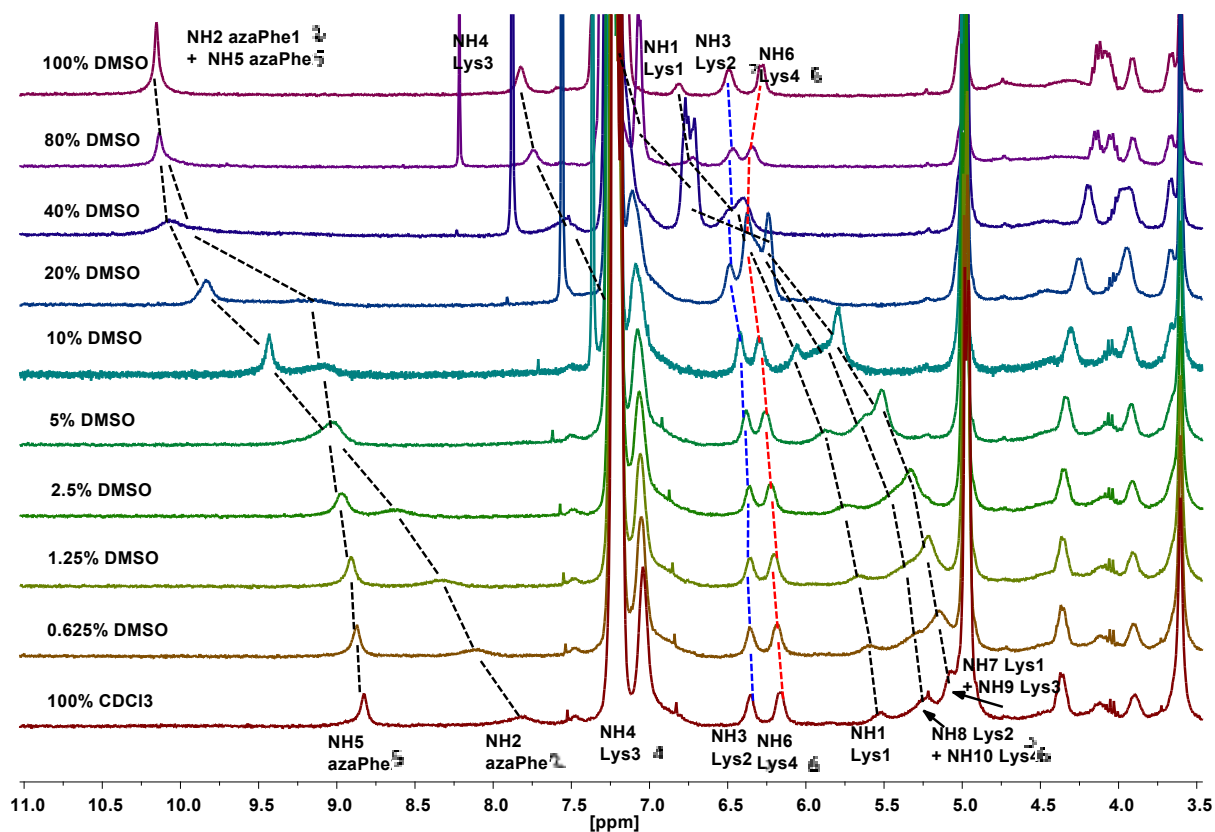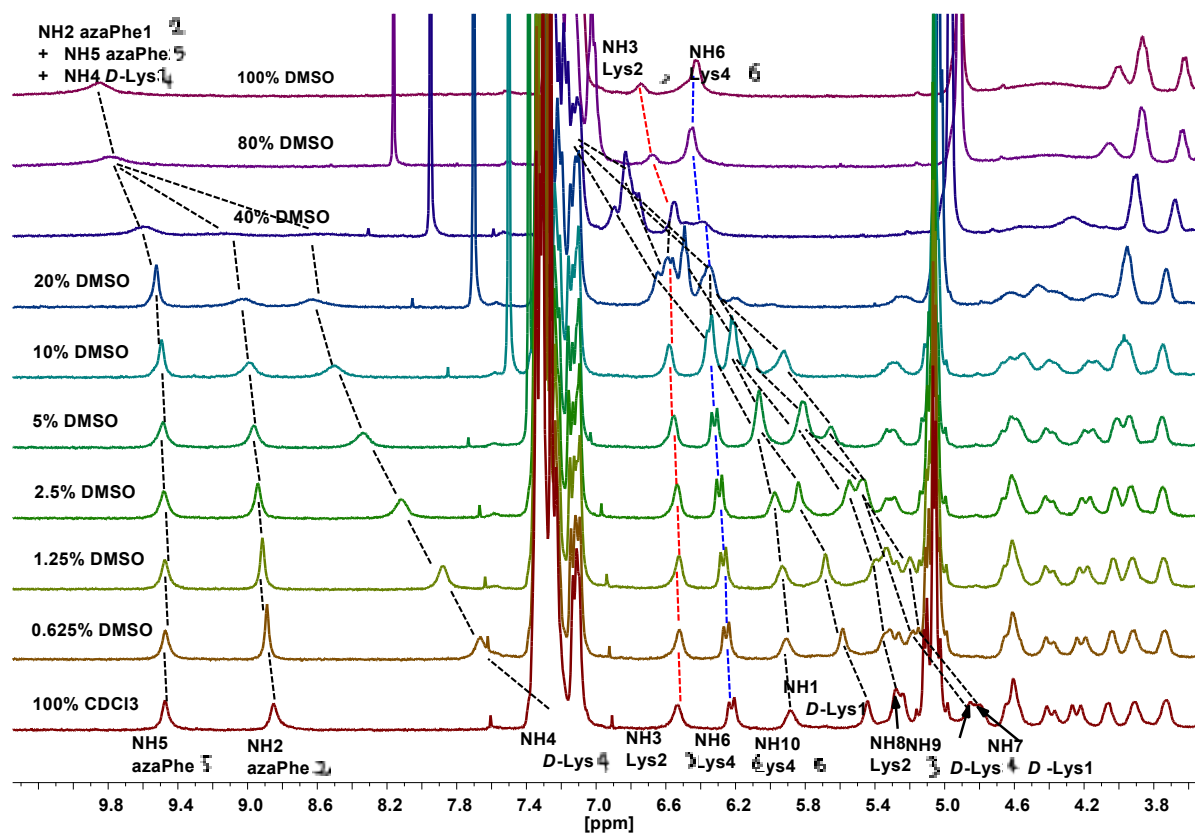

**Figure S13.** Chemical shift-variations ( $\delta$ ) of NH protons for: **8c** (up); and **8d** (bottom) as a function of % [ $\text{CDCl}_3/\text{DMSO-}d_6$ ] mixtures.

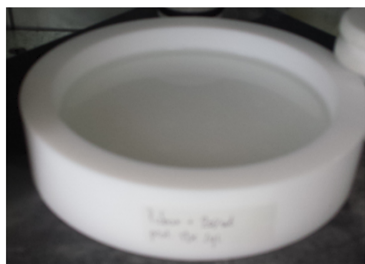

(a)

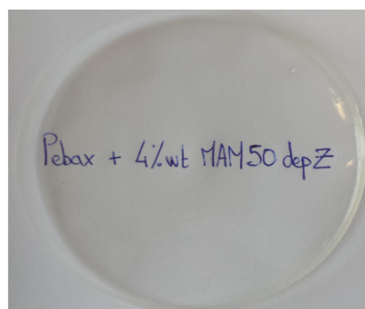

(b)

**Figure S14.** (a) Evaporation of butanol during membrane casting on a PTFE mold, and (b) example of a prepared membrane containing 4.0 wt% of the deprotected trimer (**7c'**) pseudopeptide as additive in Pebax®1074 polymer before gases separation test.
